# Supplementary material for: Syntheses, characterization, and structural studies of copper(i) complexes containing 1,1′-bis(di-tert-butylphosphino)ferrocene (dtbpf) and their application in palladium-catalyzed Sonogashira coupling of aryl halides
Source: Royal Society of Chemistry journal article supplement (doi:10.1039/c4dt01411a), 2014-01-01
Supplement: c4dt01411a1.pdf [file c4dt01411a1.pdf]

## Supplementary Information

### Syntheses, Characterization, and Structural studies of Copper(I) complexes containing 1,1'-bis(di-*tert*-butylphosphino) ferrocene (dtbpf) and their Application in Palladium-Catalyzed Sonogashira Coupling of Aryl halides

**Manoj Trivedi<sup>a\*</sup>, Gurmeet Singh<sup>a</sup>, Abhinav Kumar<sup>b</sup> and Nigam P. Rath<sup>c\*</sup>**

<sup>a\*</sup>Department of Chemistry, University of Delhi, Delhi-110007, India

<sup>b</sup>Department of Chemistry, Faculty of Science, University of Lucknow, Lucknow-226  
007, India

<sup>c\*</sup>Department of Chemistry & Biochemistry and Centre for Nanoscience, University of  
Missouri-St. Louis, One University Boulevard, St. Louis, MO 63121-4499, USA

E-mail address: manojtri@gmail.com (M.T.); rathn@umsl.edu(NPR).

Corresponding author. Tel.: + 91 9811730475 (MT); (314) 516-5333 (NPR).

**Table 1.** Crystallographic data for **1**, **2** and **3**.

|                                        | <b>1</b>                      | <b>2</b>                       | <b>3</b>                     |
|----------------------------------------|-------------------------------|--------------------------------|------------------------------|
| Empirical Formula                      | $C_{52}H_{88}Cl_4Cu_4Fe_2P_4$ | $C_{78}H_{132}Br_6Cu_6Fe_3P_6$ | $C_{52}H_{88}I_4P_4Cu_4Fe_2$ |
| FW                                     | 1344.76                       | 2283.90                        | 1710.56                      |
| crystal system                         | Orthorhombic                  | Triclinic                      | Orthorhombic                 |
| space group                            | Fddd                          | <i>P</i> -1                    | Pca21                        |
| a, Å                                   | 16.4372(15)                   | 15.0968(8)                     | 20.4931(18)                  |
| b, Å                                   | 25.568(3)                     | 17.6712(10)                    | 11.2070(9)                   |
| c, Å                                   | 30.217(3)                     | 19.1629(11)                    | 26.943(4)                    |
| $\alpha$ , deg                         | 90.00                         | 68.193(3)                      | 90.00                        |
| $\beta$ , deg                          | 90.00                         | 69.974(2)                      | 90.00                        |
| $\gamma$ , deg                         | 90.00                         | 82.735(2)                      | 90.00                        |
| V, Å <sup>3</sup>                      | 12699(2)                      | 4459.4(4)                      | 6188.0(12)                   |
| Z                                      | 8                             | 2                              | 4                            |
| $d_{\text{calc}}$ , g cm <sup>-3</sup> | 1.407                         | 1.701                          | 1.836                        |
| $\mu$ , mm <sup>-1</sup>               | 2.060                         | 4.709                          | 3.938                        |
| T, K                                   | 100(2)                        | 100(2)                         | 293(2)                       |
| R <sub>1</sub> all                     | 0.0924                        | 0.0842                         | 0.1615                       |
| R <sub>1</sub> [I > 2 $\sigma$ (I)]    | 0.0483                        | 0.0450                         | 0.1492                       |
| wR <sub>2</sub>                        | 0.1570                        | 0.0963                         | 0.3658                       |
| wR <sub>2</sub> [I > 2 $\sigma$ (I)]   | 0.1172                        | 0.0837                         | 0.3531                       |
| GoF                                    | 1.145                         | 1.014                          | 1.451                        |

**Table 2.** Selected bond lengths (Å), and Bond angles (°) for **1**, **2**, and **3**.

| 1                                              |            | 2           |            | 3                |            |
|------------------------------------------------|------------|-------------|------------|------------------|------------|
| Cu(1)-P(1)                                     | 2.1950(17) | Br(1)-Cu(1) | 2.4064(8)  | I(1)-Cu(2)       | 2.574(5)   |
| Cu(1)-Cl(1) <sup>#1</sup>                      | 2.4315(17) | Br(1)-Cu(2) | 2.4763(7)  | I(1)-Cu(4)       | 2.738(5)   |
| Cu(1)-Cl(1)                                    | 2.3747(16) | Br(2)-Cu(1) | 2.3884(8)  | I(1)-Cu(1)       | 2.801(5)   |
| Cu(1)-Cl(1) <sup>#2</sup>                      | 2.5269(16) | Br(2)-Cu(3) | 2.4759(8)  | I(4)-Cu(3)       | 2.538(5)   |
| Cu(1)-Cu(1) <sup>#3</sup>                      | 2.9369(16) | Br(3)-Cu(3) | 2.4308(7)  | I(4)-Cu(4)       | 2.648(5)   |
| Cl(1)-Cu(1) <sup>#1</sup>                      | 2.4315(17) | Br(3)-Cu(2) | 2.4311(7)  | I(2)-Cu(2)       | 2.555(5)   |
| Cl(1)-Cu(1) <sup>#2</sup>                      | 2.5270(16) | Br(4)-Cu(4) | 2.4592(8)  | I(2)-Cu(1)       | 2.659(5)   |
| P(1)-C(1)                                      | 1.821(6)   | Br(4)-Cu(5) | 2.4740(8)  | I(3)-Cu(3)       | 2.567(5)   |
| P(1)-C(6)                                      | 1.917(7)   | Br(5)-Cu(6) | 2.4232(7)  | I(3)-Cu(1)       | 2.756(5)   |
| P(1)-C(10)                                     | 1.885(7)   | Br(5)-Cu(5) | 2.6883(8)  | I(3)-Cu(4)       | 2.854(5)   |
| P(1)-Cu(1)-Cl(1)                               | 132.25(7)  | Br(5)-Cu(4) | 2.6900(9)  | Cu(2)-P(2)       | 2.203(10)  |
| P(1)-Cu(1)-Cl(1) <sup>#1</sup>                 | 115.35(7)  | Br(6)-Cu(6) | 2.4413(8)  | Cu(2)-Cu(1)      | 2.731(6)   |
| Cl(1) <sup>#1</sup> -Cu(1)-Cl(1)               | 94.05(6)   | Br(6)-Cu(5) | 2.5669(8)  | Cu(3)-P(3)       | 2.229(10)  |
| P(1)-Cu(1)-Cl(1) <sup>#2</sup>                 | 116.84(6)  | Br(6)-Cu(4) | 2.7471(8)  | Cu(3)-Cu(4)      | 2.733(6)   |
| Cl(1)-Cu(1)-Cl(1) <sup>#2</sup>                | 87.06(6)   | Cu(1)-P(1)  | 2.1998(13) | Cu(4)-P(4)       | 2.232(10)  |
| Cl(1) <sup>#1</sup> -Cu(1)-Cl(1) <sup>#2</sup> | 105.70(5)  | Cu(1)-Cu(2) | 2.9789(8)  | Cu(1)-P(1)       | 2.273(9)   |
| P(1)-Cu(1)-Cu(1) <sup>#3</sup>                 | 125.43(5)  | Cu(2)-P(2)  | 2.2134(12) | P(2)-C(29)       | 1.97(3)    |
| Cl(1)-Cu(1)-Cu(1) <sup>#3</sup>                | 102.10(4)  | Cu(2)-Cu(3) | 2.8597(8)  | P(2)-C(33)       | 1.82(3)    |
| Cl(1) <sup>#1</sup> -Cu(1)-Cu(1) <sup>#3</sup> | 55.20(4)   | Cu(3)-P(3)  | 2.2048(13) | P(1)-C(21)       | 1.91(4)    |
| Cl(1) <sup>#2</sup> -Cu(1)-Cu(1) <sup>#3</sup> | 52.19(4)   | Cu(4)-P(4)  | 2.2216(13) | P(1)-C(25)       | 1.94(3)    |
| Cu(1)-Cl(1)-Cu(1) <sup>#1</sup>                | 84.76(5)   | Cu(4)-Cu(5) | 2.6980(8)  | P(4)-C(49)       | 1.91(4)    |
| Cu(1)-Cl(1)-Cu(1) <sup>#2</sup>                | 88.57(5)   | Cu(5)-P(5)  | 2.2088(12) | P(4)-C(45)       | 1.96(3)    |
| Cu(1) <sup>#1</sup> -Cl(1)-Cu(1) <sup>#2</sup> | 72.61(5)   | Cu(5)-Cu(6) | 2.8962(8)  | P(3)-C(37)       | 1.79(3)    |
|                                                |            | Cu(6)-P(6)  | 2.2059(13) | P(3)-C(41)       | 1.91(2)    |
|                                                |            | P(1)-C(19)  | 1.877(5)   | Cu(2)-I(1)-Cu(4) | 125.80(16) |
|                                                |            | P(1)-C(23)  | 1.888(5)   | Cu(2)-I(1)-Cu(1) | 60.90(14)  |
|                                                |            | P(2)-C(11)  | 1.883(5)   | Cu(4)-I(1)-Cu(1) | 89.84(16)  |

|                   |            |                  |            |
|-------------------|------------|------------------|------------|
| P(3)-C(37)        | 1.878(5)   | Cu(3)-I(4)-Cu(4) | 63.56(15)  |
| P(3)-C(41)        | 1.900(5)   | Cu(2)-I(2)-Cu(1) | 63.14(15)  |
| P(4)-C(49)        | 1.887(5)   | Cu(3)-I(3)-Cu(1) | 125.92(17) |
| P(4)-C(45)        | 1.902(5)   | Cu(3)-I(3)-Cu(4) | 60.27(14)  |
| P(5)-C(63)        | 1.885(5)   | Cu(1)-I(3)-Cu(4) | 88.41(15)  |
| P(5)-C(67)        | 1.902(4)   | P(2)-Cu(2)-I(2)  | 126.2(3)   |
| P(6)-C(71)        | 1.888(5)   | P(2)-Cu(2)-I(1)  | 121.1(3)   |
| P(6)-C(75)        | 1.897(5)   | I(2)-Cu(2)-I(1)  | 112.12(18) |
| P(2)-C(15)        | 1.898(4)   | P(2)-Cu(2)-Cu(1) | 140.2(3)   |
| Cu(1)-Br(1)-Cu(2) | 75.18(2)   | I(2)-Cu(2)-Cu(1) | 60.28(14)  |
| Cu(1)-Br(2)-Cu(3) | 86.57(3)   | I(1)-Cu(2)-Cu(1) | 63.66(14)  |
| Cu(3)-Br(3)-Cu(2) | 72.06(2)   | P(3)-Cu(3)-I(4)  | 124.5(3)   |
| Cu(4)-Br(4)-Cu(5) | 66.31(2)   | P(3)-Cu(3)-I(3)  | 122.6(3)   |
| Cu(6)-Br(5)-Cu(5) | 68.80(2)   | I(4)-Cu(3)-I(3)  | 112.65(19) |
| Cu(6)-Br(5)-Cu(4) | 86.30(3)   | P(3)-Cu(3)-Cu(4) | 140.6(3)   |
| Cu(5)-Br(5)-Cu(4) | 60.22(2)   | I(4)-Cu(3)-Cu(4) | 60.18(14)  |
| Cu(6)-Br(6)-Cu(5) | 70.61(2)   | I(3)-Cu(3)-Cu(4) | 65.07(14)  |
| Cu(6)-Br(6)-Cu(4) | 84.69(3)   | P(4)-Cu(4)-I(4)  | 119.5(3)   |
| Cu(5)-Br(6)-Cu(4) | 60.91(2)   | P(4)-Cu(4)-I(1)  | 119.1(3)   |
| P(1)-Cu(1)-Br(2)  | 124.71(4)  | I(4)-Cu(4)-I(1)  | 99.59(16)  |
| P(1)-Cu(1)-Br(1)  | 128.83(4)  | P(4)-Cu(4)-Cu(3) | 115.9(3)   |
| Br(2)-Cu(1)-Br(1) | 106.06(3)  | I(4)-Cu(4)-Cu(3) | 56.26(13)  |
| Br(2)-Cu(1)-Cu(2) | 67.64(2)   | Cu(3)-Cu(4)-I(1) | 124.55(18) |
| Br(1)-Cu(1)-Cu(2) | 53.48(2)   | P(4)-Cu(4)-I(3)  | 121.4(3)   |
| P(2)-Cu(2)-Br(3)  | 121.51(4)  | I(4)-Cu(4)-I(3)  | 101.03(15) |
| P(2)-Cu(2)-Br(1)  | 119.23(4)  | I(1)-Cu(4)-I(3)  | 90.50(14)  |
| Br(3)-Cu(2)-Br(1) | 109.63(3)  | Cu(3)-Cu(4)-I(3) | 54.66(13)  |
| P(2)-Cu(2)-Cu(3)  | 170.85(4)  | P(1)-Cu(1)-I(2)  | 118.8(3)   |
| Br(3)-Cu(2)-Cu(3) | 53.967(19) | P(1)-Cu(1)-I(3)  | 119.9(3)   |
| Br(1)-Cu(2)-Cu(3) | 69.39(2)   | P(1)-Cu(1)-I(1)  | 120.6(3)   |

|                   |            |                  |            |
|-------------------|------------|------------------|------------|
| Br(1)-Cu(2)-Cu(1) | 51.346(19) | I(3)-Cu(1)-I(1)  | 91.26(14)  |
| Cu(3)-Cu(2)-Cu(1) | 69.65(2)   | Cu(2)-Cu(1)-I(3) | 124.55(19) |
| P(3)-Cu(3)-Br(3)  | 127.09(4)  |                  |            |
| P(3)-Cu(3)-Br(2)  | 129.12(4)  |                  |            |
| Br(3)-Cu(3)-Br(2) | 98.73(3)   |                  |            |
| P(3)-Cu(3)-Cu(2)  | 154.45(4)  |                  |            |
| Br(3)-Cu(3)-Cu(2) | 53.977(19) |                  |            |
| Br(2)-Cu(3)-Cu(2) | 68.70(2)   |                  |            |
| P(4)-Cu(4)-Br(4)  | 121.59(4)  |                  |            |
| P(4)-Cu(4)-Br(5)  | 124.34(4)  |                  |            |
| Br(4)-Cu(4)-Br(5) | 97.72(3)   |                  |            |
| P(4)-Cu(4)-Cu(5)  | 175.57(5)  |                  |            |
| Br(4)-Cu(4)-Cu(5) | 57.11(2)   |                  |            |
| Br(5)-Cu(4)-Cu(5) | 59.86(2)   |                  |            |
| P(4)-Cu(4)-Br(6)  | 121.15(4)  |                  |            |
| Br(4)-Cu(4)-Br(6) | 98.10(3)   |                  |            |
| Br(5)-Cu(4)-Br(6) | 85.75(2)   |                  |            |
| Cu(5)-Cu(4)-Br(6) | 56.24(2)   |                  |            |
| P(5)-Cu(5)-Br(4)  | 113.56(4)  |                  |            |
| P(5)-Cu(5)-Br(6)  | 124.58(4)  |                  |            |
| Br(4)-Cu(5)-Br(6) | 102.68(3)  |                  |            |
| P(5)-Cu(5)-Br(5)  | 123.64(4)  |                  |            |
| Br(4)-Cu(5)-Br(5) | 97.40(3)   |                  |            |
| Br(6)-Cu(5)-Br(5) | 89.47(2)   |                  |            |
| P(5)-Cu(5)-Cu(4)  | 169.99(4)  |                  |            |
| Br(4)-Cu(5)-Cu(4) | 56.58(2)   |                  |            |
| Br(6)-Cu(5)-Cu(4) | 62.84(2)   |                  |            |
| Br(4)-Cu(5)-Br(5) | 97.40(3)   |                  |            |
| Br(6)-Cu(5)-Br(5) | 89.47(2)   |                  |            |
| Br(6)-Cu(5)-Cu(6) | 52.67(2)   |                  |            |

|                   |            |
|-------------------|------------|
| Br(5)-Cu(5)-Cu(6) | 51.267(19) |
| Cu(4)-Cu(5)-Cu(6) | 77.43(2)   |
| Br(6)-Cu(5)-Cu(6) | 52.67(2)   |
| P(6)-Cu(6)-Br(5)  | 128.84(4)  |
| P(6)-Cu(6)-Br(6)  | 131.86(4)  |
| Br(5)-Cu(6)-Br(6) | 99.03(3)   |
| C(6)-P(1)-Cu(1)   | 105.82(14) |
| C(1)-P(2)-Cu(2)   | 115.93(14) |
| C(32)-P(3)-Cu(3)  | 110.17(14) |
| C(19)-P(1)-Cu(1)  | 113.32(15) |
| C(23)-P(1)-Cu(1)  | 115.34(16) |
| C(11)-P(2)-Cu(2)  | 108.93(15) |
| C(15)-P(2)-Cu(2)  | 112.57(14) |
| C(37)-P(3)-Cu(3)  | 112.86(16) |
| C(41)-P(3)-Cu(3)  | 113.21(15) |
| C(27)-P(4)-Cu(4)  | 108.62(14) |
| C(49)-P(4)-Cu(4)  | 114.45(16) |
| C(45)-P(4)-Cu(4)  | 112.01(14) |
| C(53)-P(5)-Cu(5)  | 116.34(14) |
| C(58)-P(6)-Cu(6)  | 106.50(14) |
| C(67)-P(5)-Cu(5)  | 110.52(15) |
| C(63)-P(5)-Cu(5)  | 110.60(16) |
| C(71)-P(6)-Cu(6)  | 113.80(15) |
| C(75)-P(6)-Cu(6)  | 115.55(15) |

---

**Table 3.** Hydrogen bonds for the complexes **1-3** [ $\text{\AA}$  and  $^\circ$ ].

| D-H $\cdots$ A                                                                                      | d(D-H) | d(H $\cdots$ A) | d(D $\cdots$ A) | $\angle$ (DHA) |
|-----------------------------------------------------------------------------------------------------|--------|-----------------|-----------------|----------------|
| <b>Complex-1</b>                                                                                    |        |                 |                 |                |
| C(2)-H(2) $\cdots$ Cl(1)                                                                            | 0.95   | 2.74            | 3.622           | 154            |
| Symmetry transformations used to generate equivalent atoms: x,1/4-y,1/4-z                           |        |                 |                 |                |
| <b>Complex-2</b>                                                                                    |        |                 |                 |                |
| C(7)-H(7) $\cdots$ Br(1)                                                                            | 0.95   | 3.14            | 3.985(4)        | 149.6          |
| C(13)-H(13C) $\cdots$ Br(1)                                                                         | 0.98   | 3.08            | 4.009(4)        | 158.6          |
| C(16)-H(16C) $\cdots$ Br(3)                                                                         | 0.98   | 3.04            | 3.965(5)        | 158.5          |
| C(21)-H(21A) $\cdots$ Br(2)                                                                         | 0.98   | 2.93            | 3.875(4)        | 161.3          |
| C(22)-H(22C) $\cdots$ Br(4) <sup>#1</sup>                                                           | 0.98   | 3.05            | 3.720(5)        | 126.9          |
| C(28)-H(28) $\cdots$ Br(4)                                                                          | 0.95   | 2.95            | 3.815(4)        | 152.6          |
| C(40)-H(40C) $\cdots$ Br(2)                                                                         | 0.98   | 3.14            | 4.082(5)        | 161.9          |
| C(44)-H(44A) $\cdots$ Br(1)                                                                         | 0.98   | 2.90            | 3.809(5)        | 153.9          |
| C(47)-H(47A) $\cdots$ Br(4)                                                                         | 0.98   | 3.08            | 3.808(5)        | 132.4          |
| C(69)-H(69A) $\cdots$ Br(4)                                                                         | 0.98   | 2.90            | 3.828(5)        | 157.6          |
| C(72)-H(72C) $\cdots$ Br(3) <sup>#2</sup>                                                           | 0.98   | 3.07            | 3.824(4)        | 134.9          |
| C(74)-H(74A) $\cdots$ Br(3) <sup>#2</sup>                                                           | 0.98   | 3.09            | 3.744(5)        | 125.1          |
| C(77)-H(77C) $\cdots$ Br(3) <sup>#2</sup>                                                           | 0.98   | 3.05            | 3.964(5)        | 155.9          |
| Symmetry transformations used to generate equivalent atoms:<br>#1 -x, -y+1, -z+1, #2 -x+1, -y+2, -z |        |                 |                 |                |
| <b>Complex-3</b>                                                                                    |        |                 |                 |                |
| C(43)-H(43C) $\cdots$ I(4)                                                                          | 0.96   | 3.03            | 3.83(4)         | 142            |

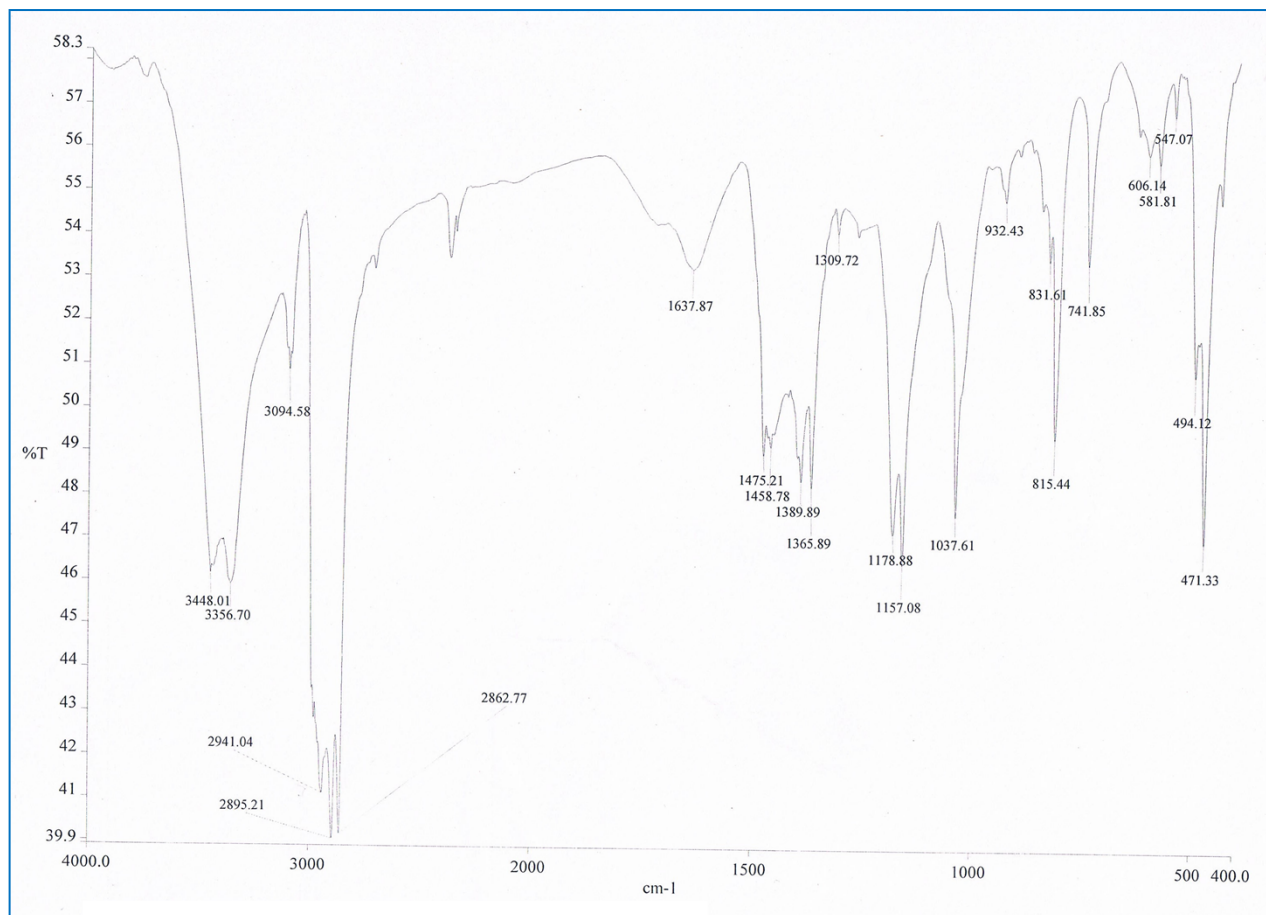

**F-1.** Infrared spectrum of **1**.



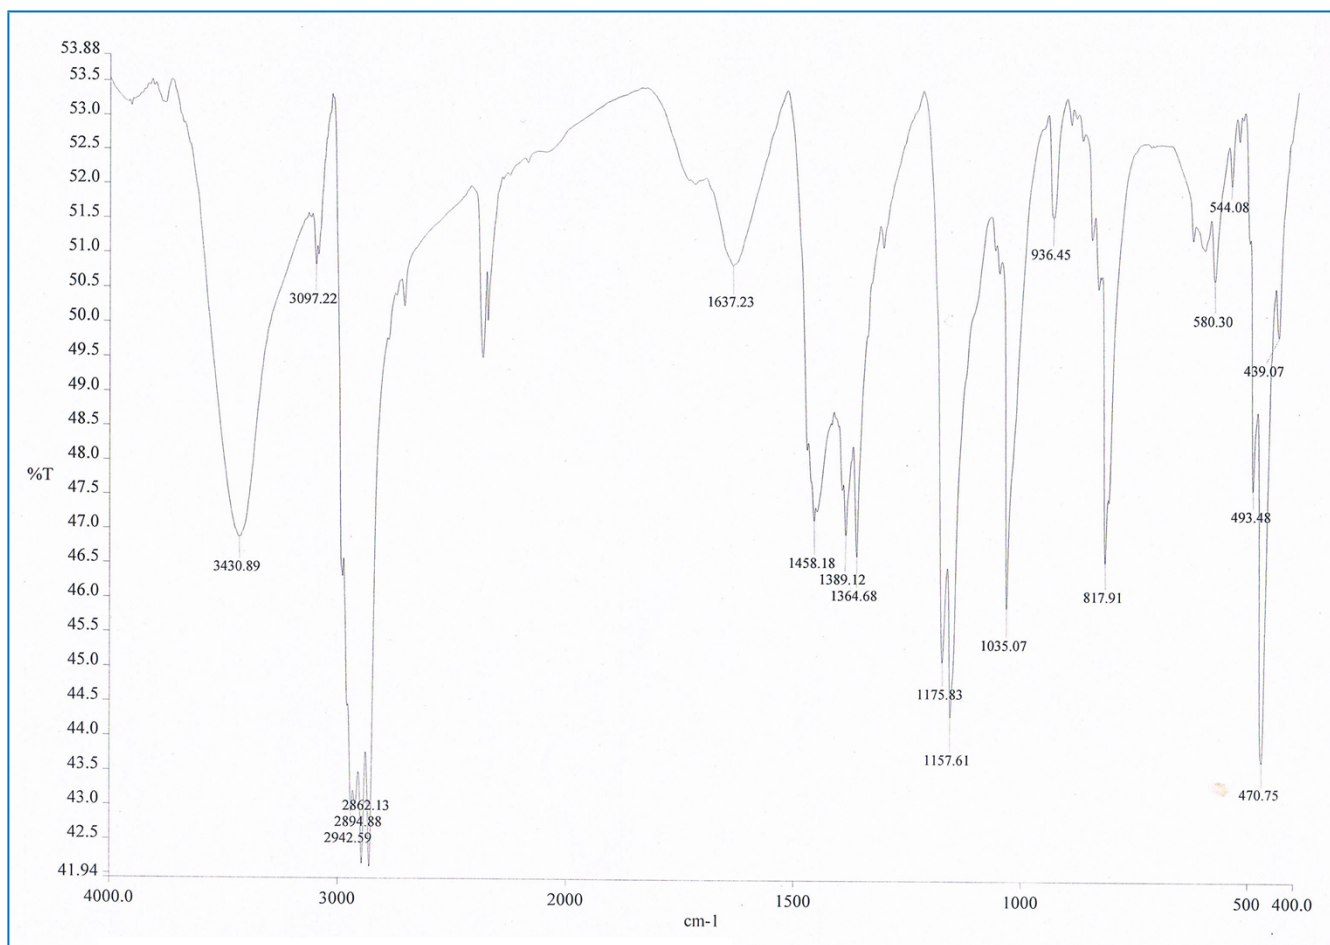

F-2. Infrared spectrum spectrum of 3.

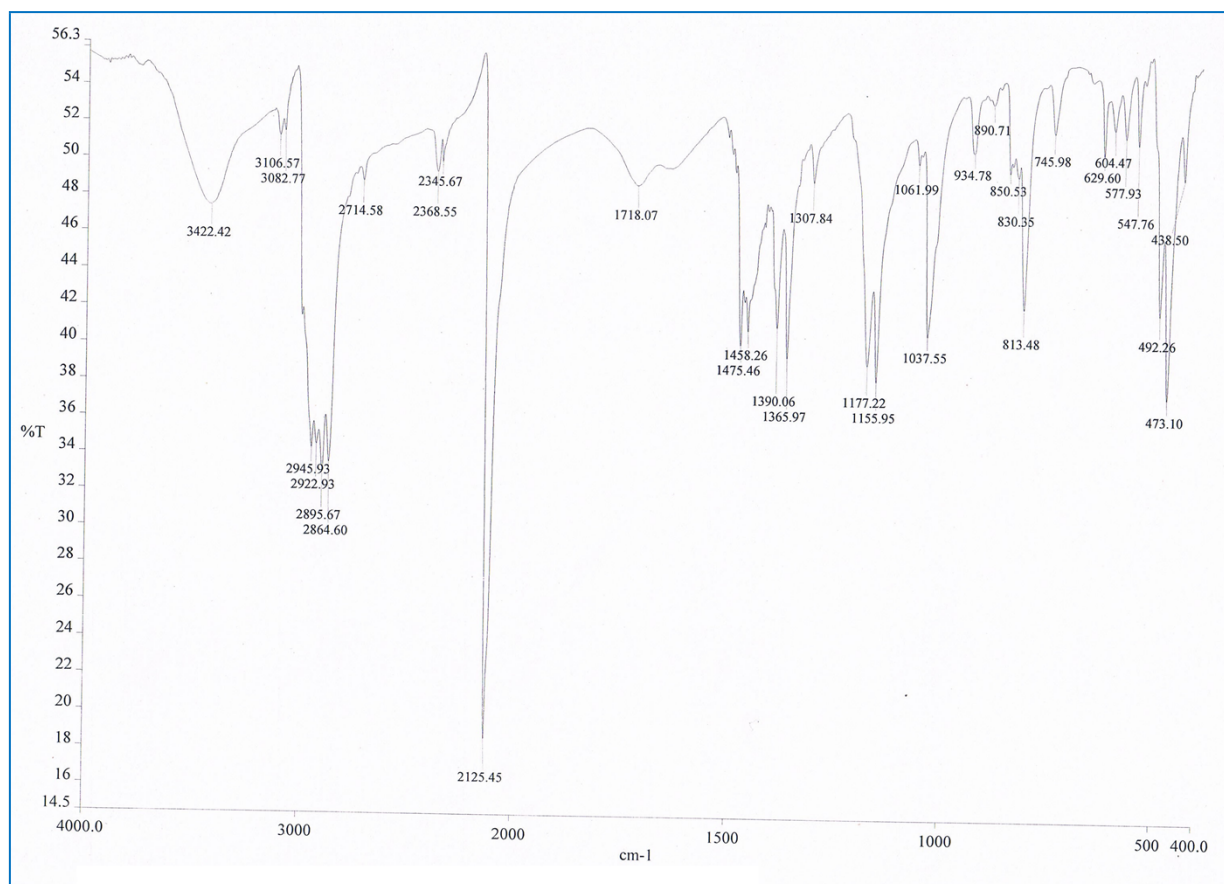

F-3. Infrared spectrum of 2.

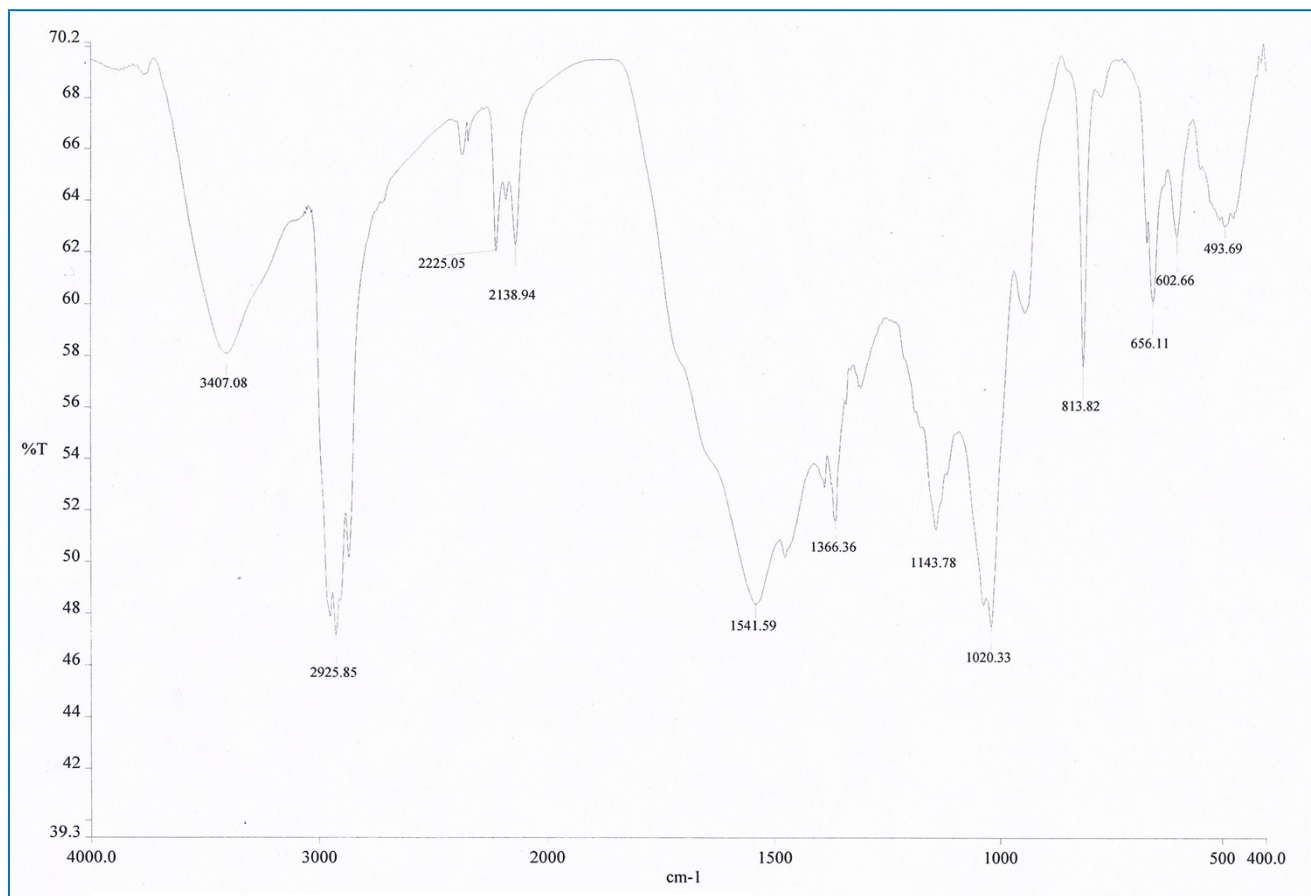

**F-4.** Infrared spectrum of 4.

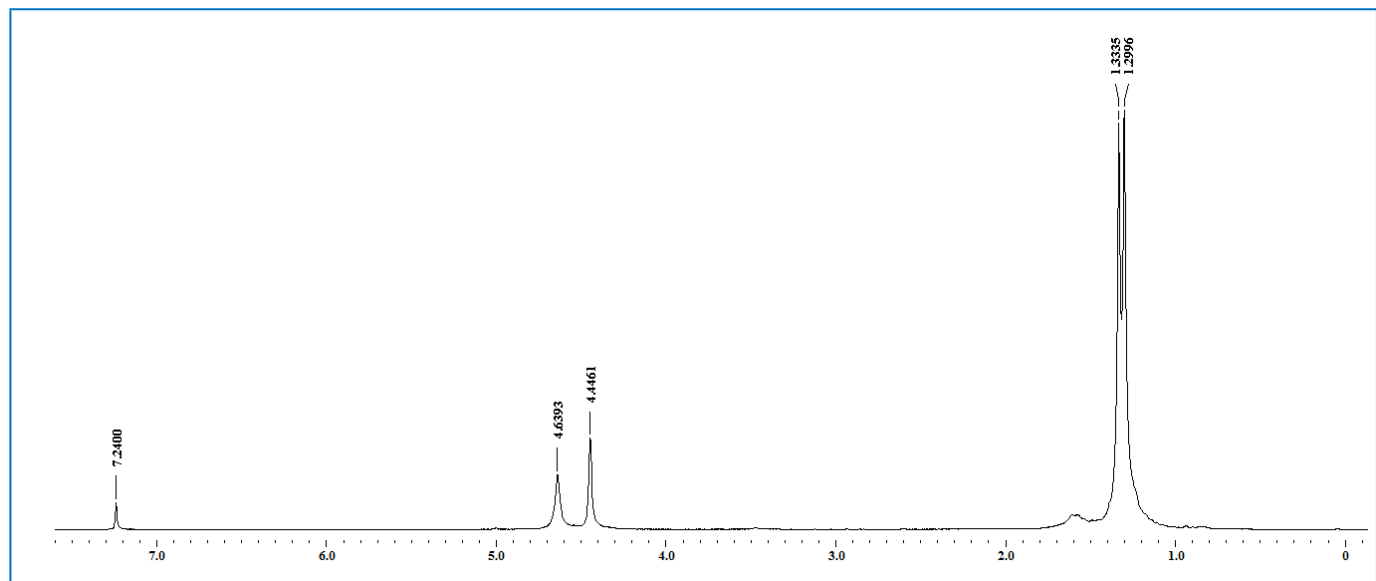

**F-5.**  $^1\text{H}$  NMR spectrum of **1** in  $\text{CDCl}_3$ .

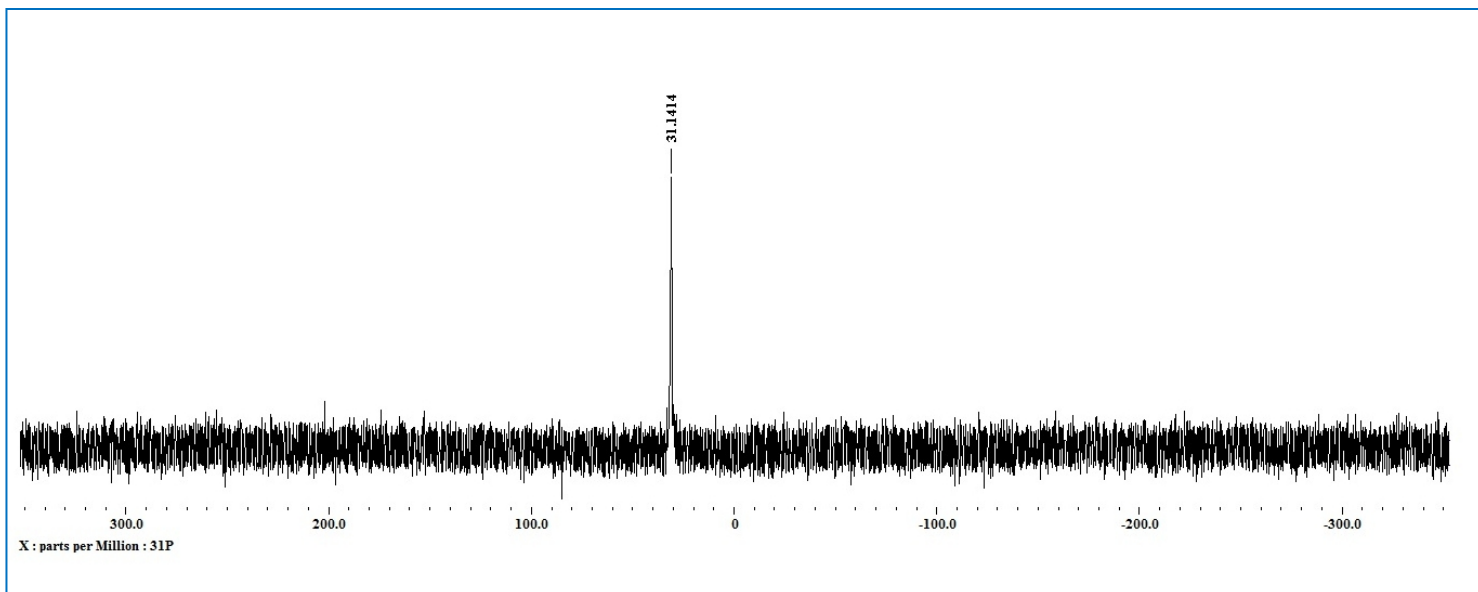

F-6.  $^{31}\text{P}$  NMR spectrum of **1** in  $\text{CDCl}_3$ .

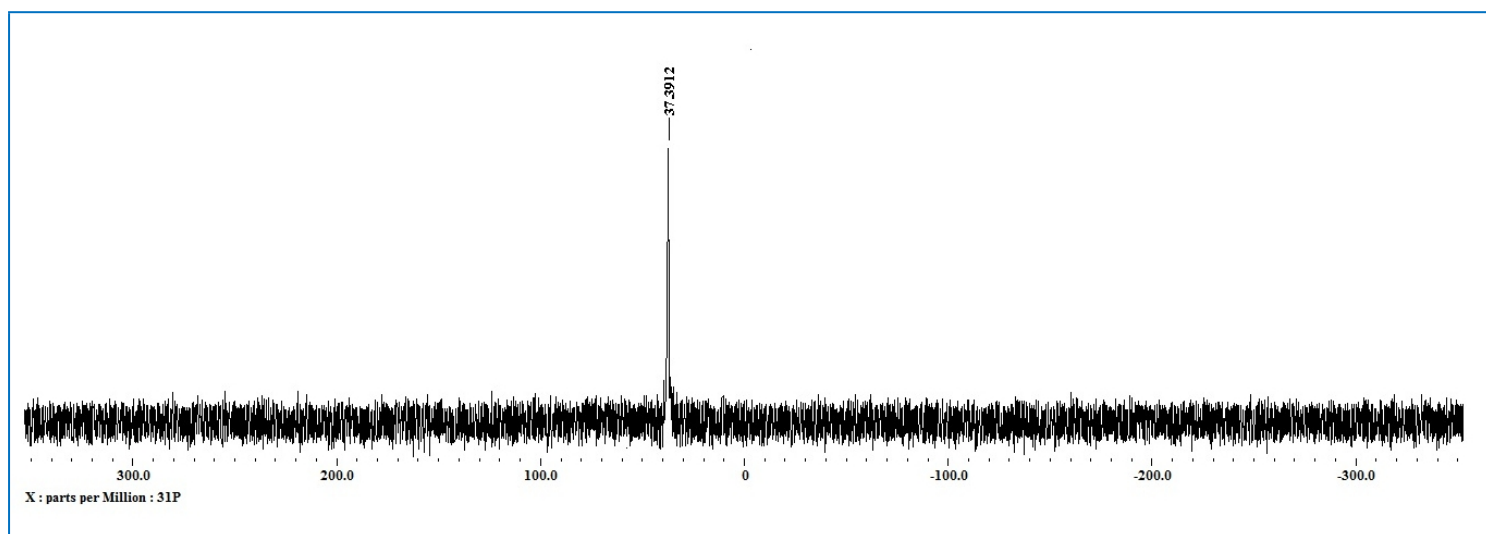

F-7.  $^{31}\text{P}$  NMR spectrum of **2** in  $\text{CDCl}_3$ .

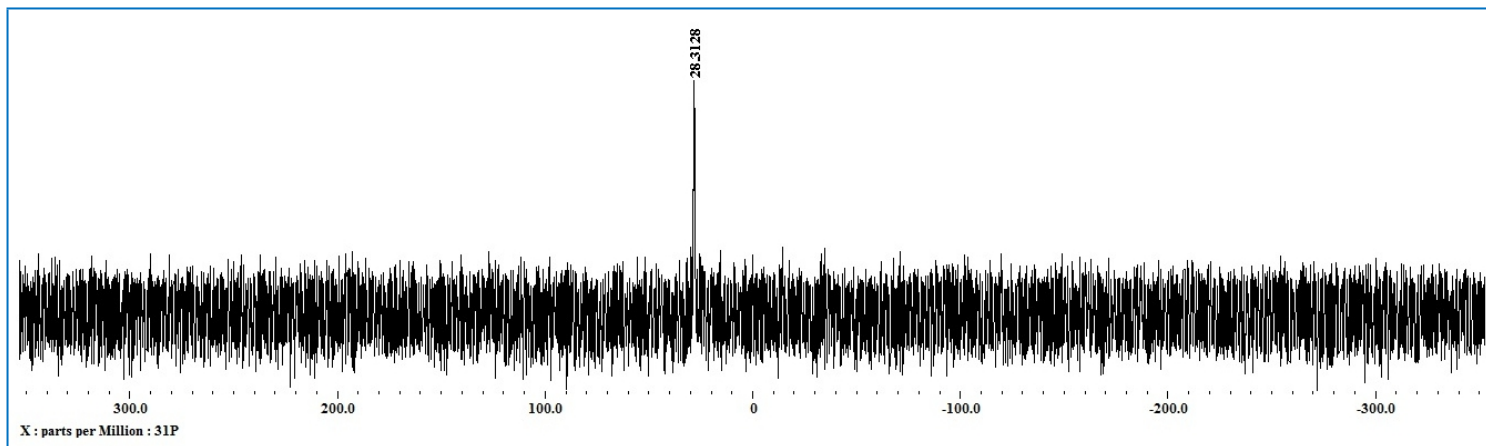

F-8.  $^{31}\text{P}$  NMR spectrum of **3** in  $\text{CDCl}_3$ .

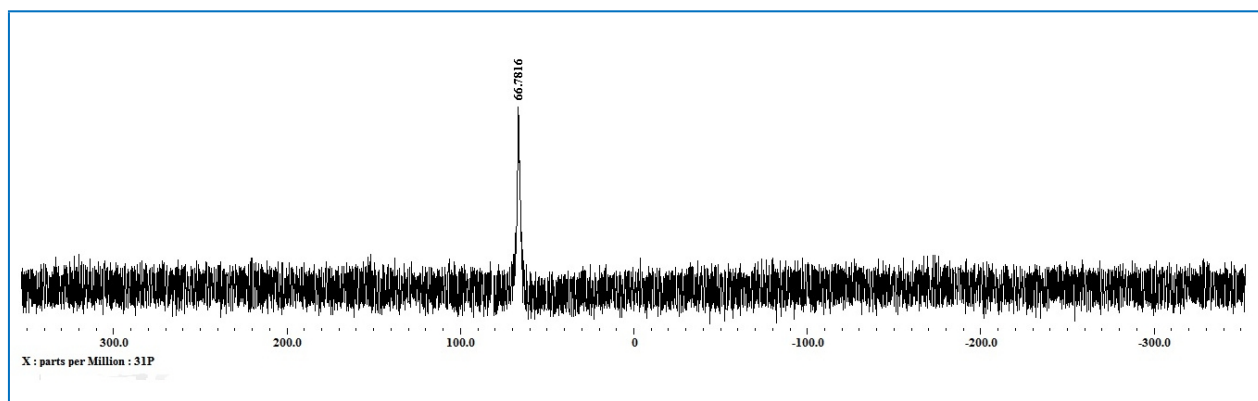

F-9.  $^{31}\text{P}$  NMR spectrum of **4** in  $\text{CDCl}_3$ .

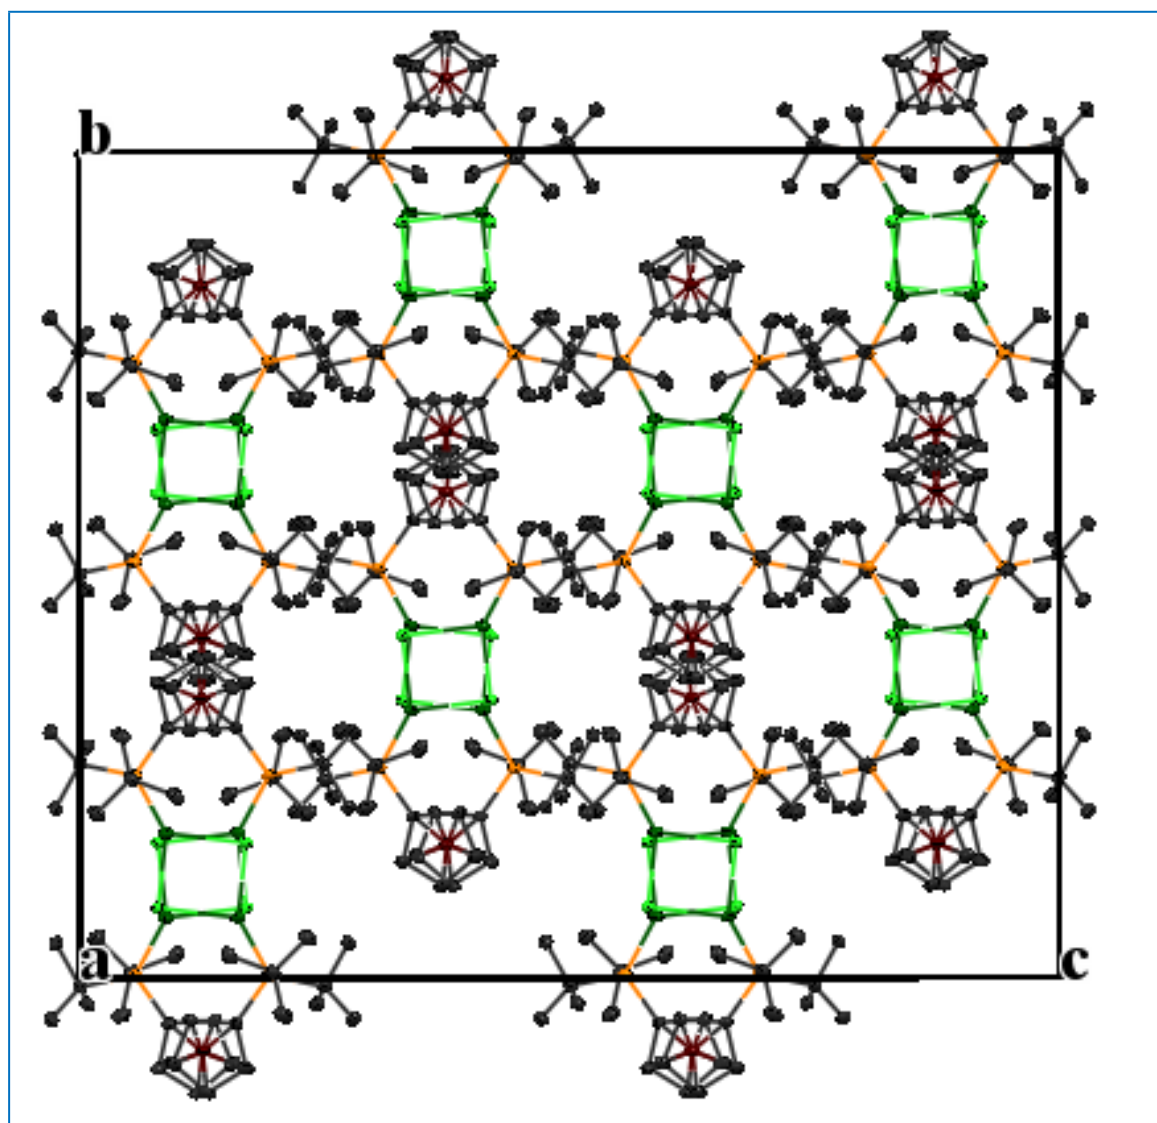

**F-10.** Crystal packing diagram of **1**, viewed along the  $a$  axis.



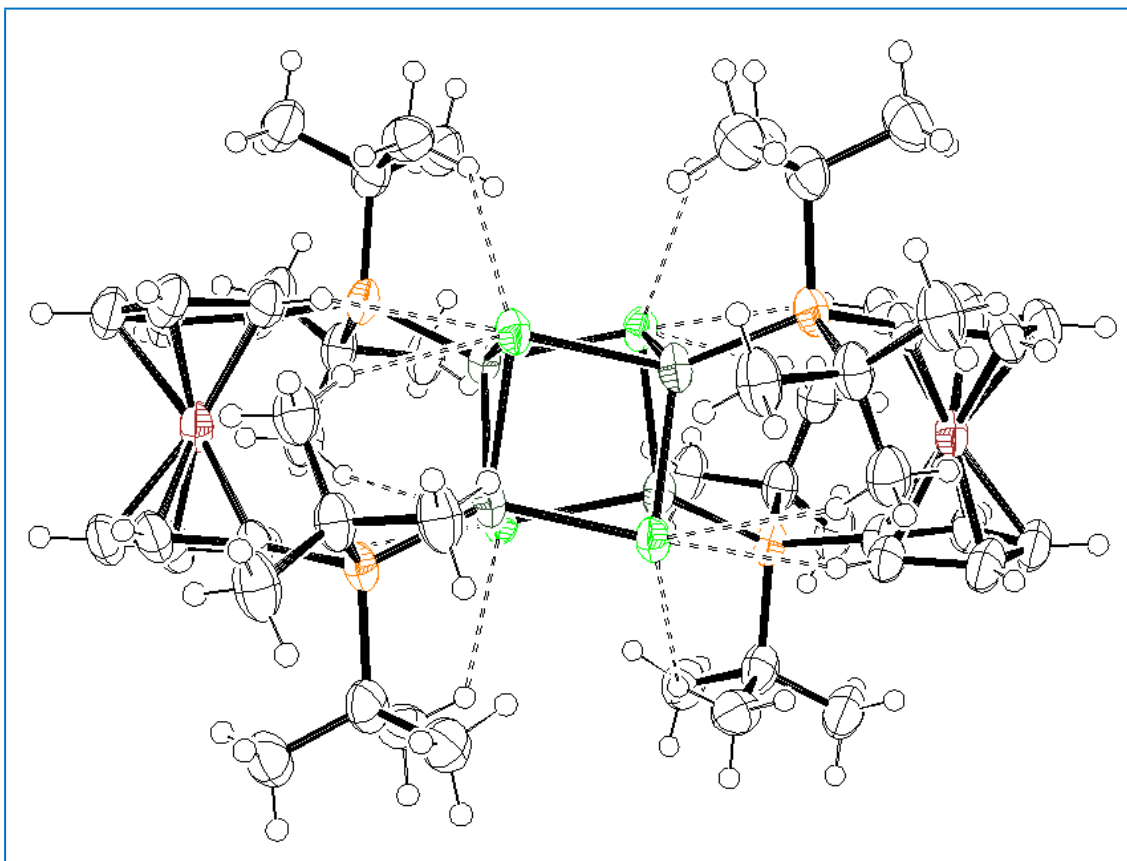

**F-11.** Ortep diagram of **1** showing C-H...Cl hydrogen bond interactions in the crystal lattice.

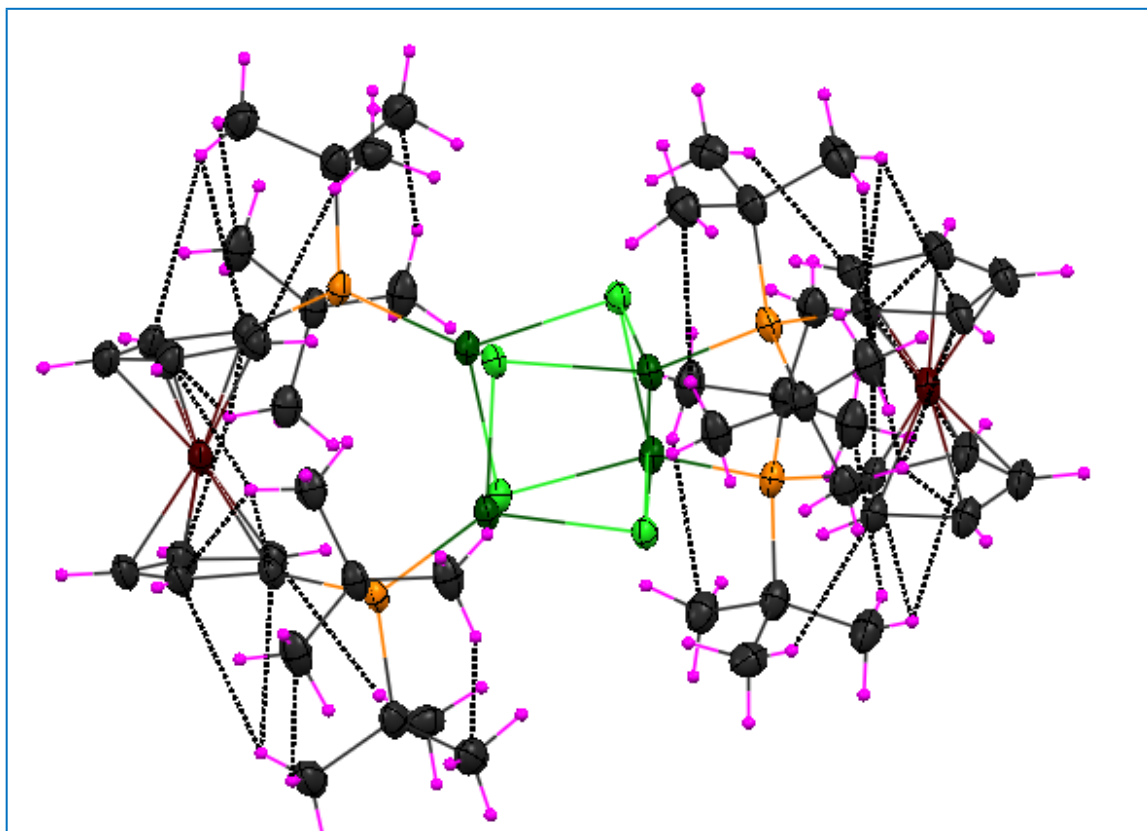

**F-12.** C-H... $\pi$  interactions in **1**.

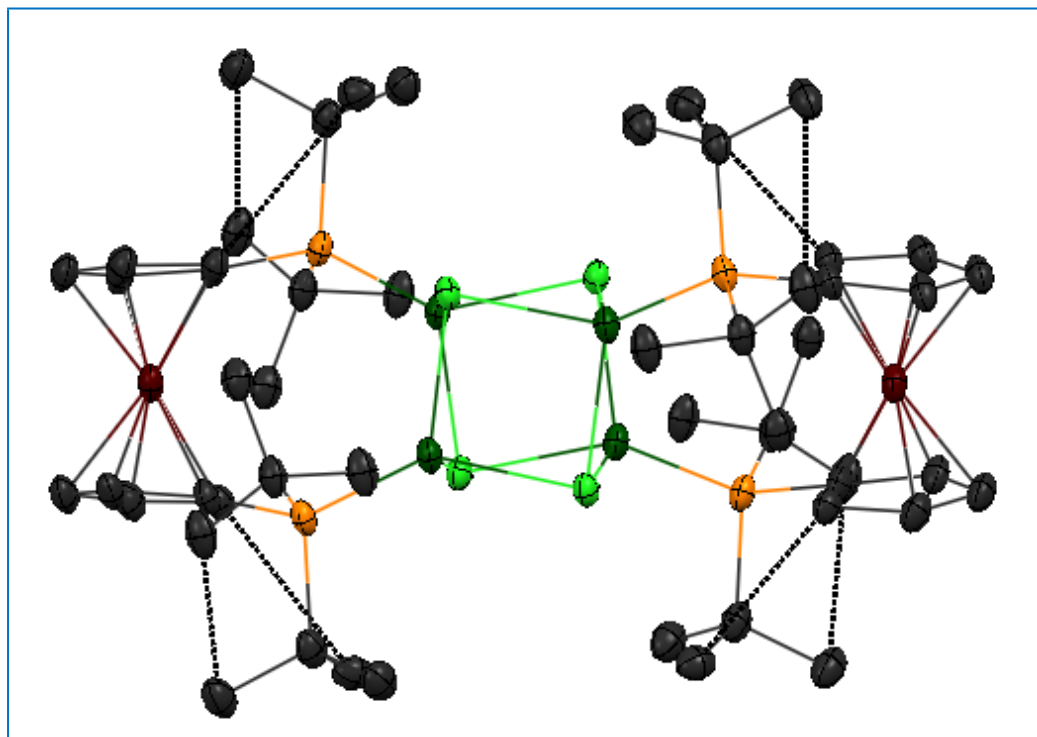

F-13.  $\pi \cdots \pi$  interactions in 1.

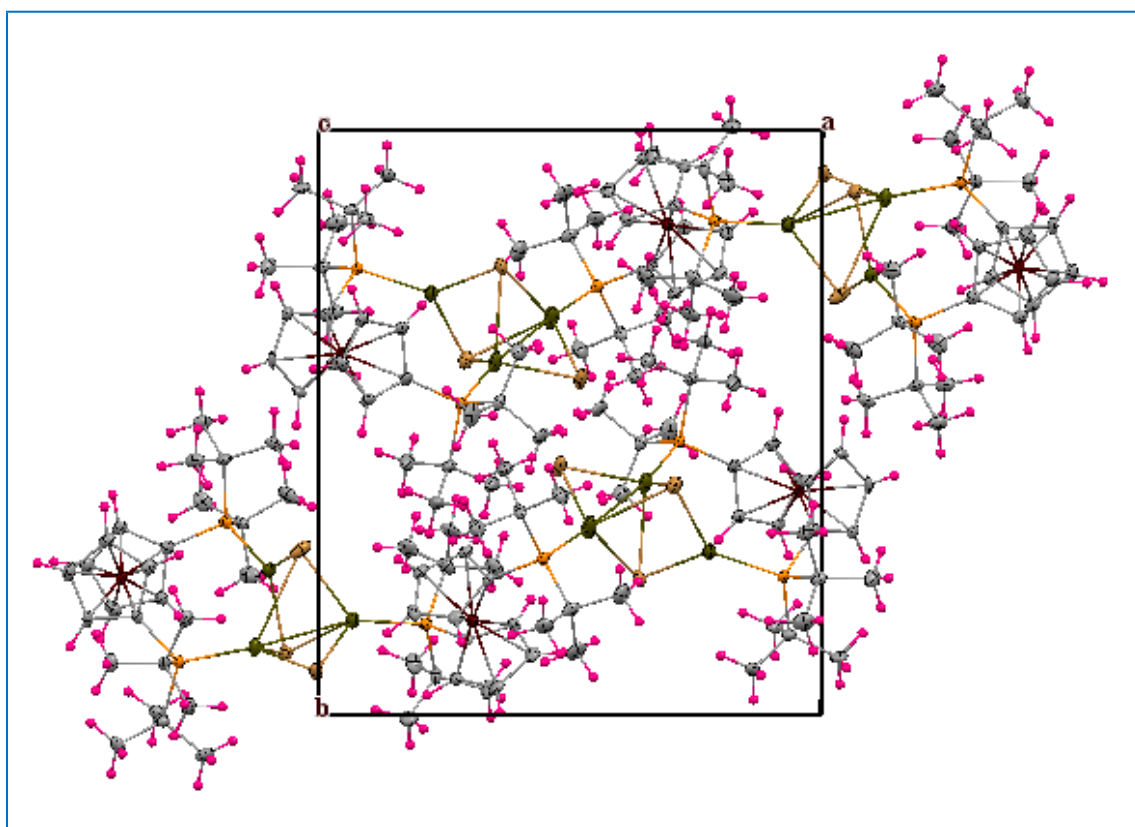

**F-14.** Crystal packing diagram of **2**, viewed along the *c* axis.

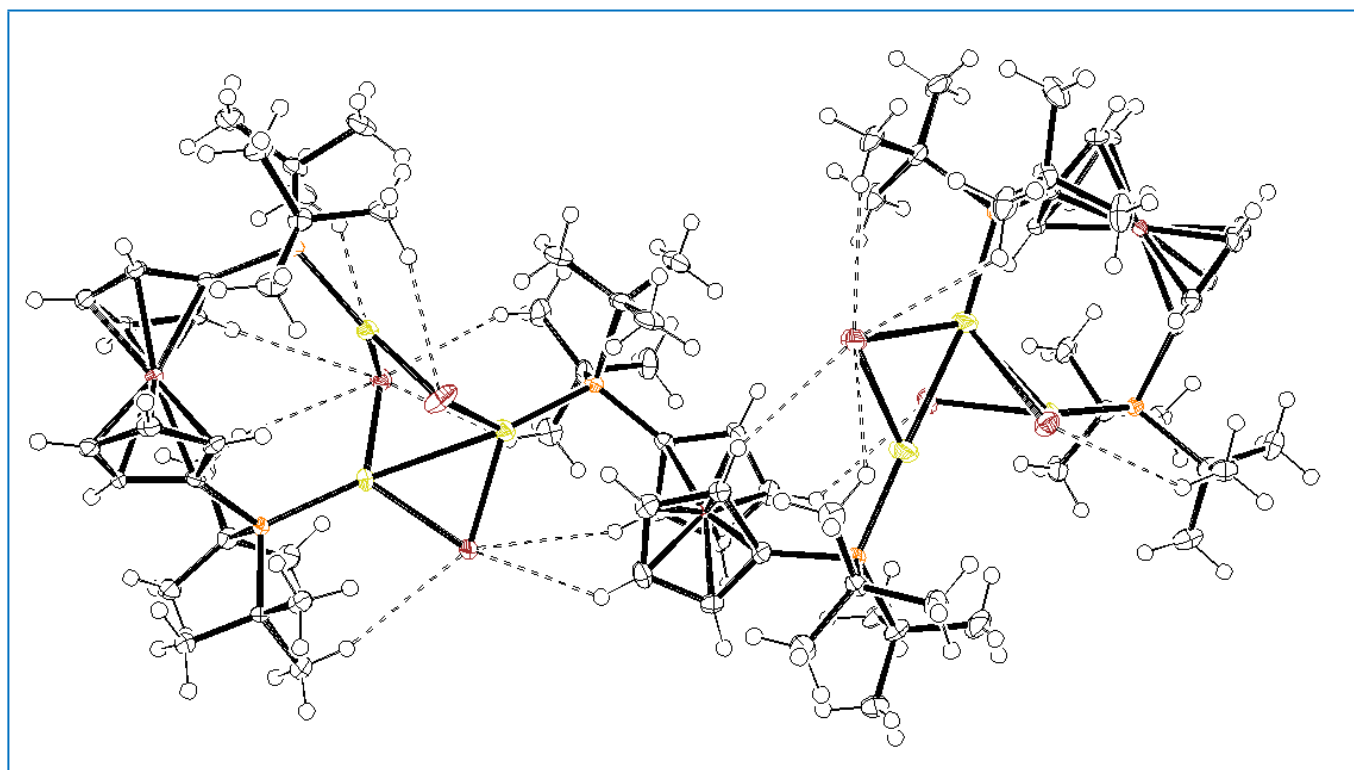

**F-15.** Ortep diagram of **2** showing C-H...Br hydrogen bond interactions in the crystal lattice.

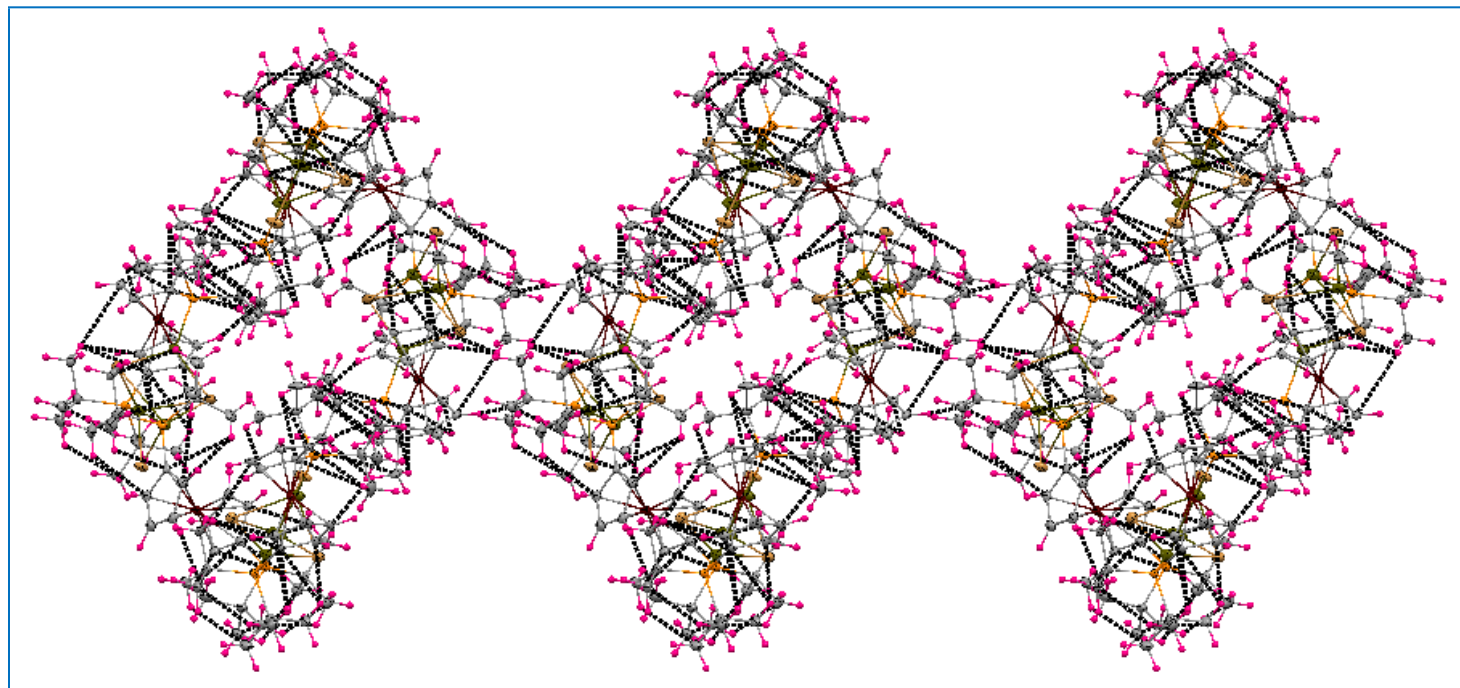

**F-16.** C-H... $\pi$  interactions in **3**.

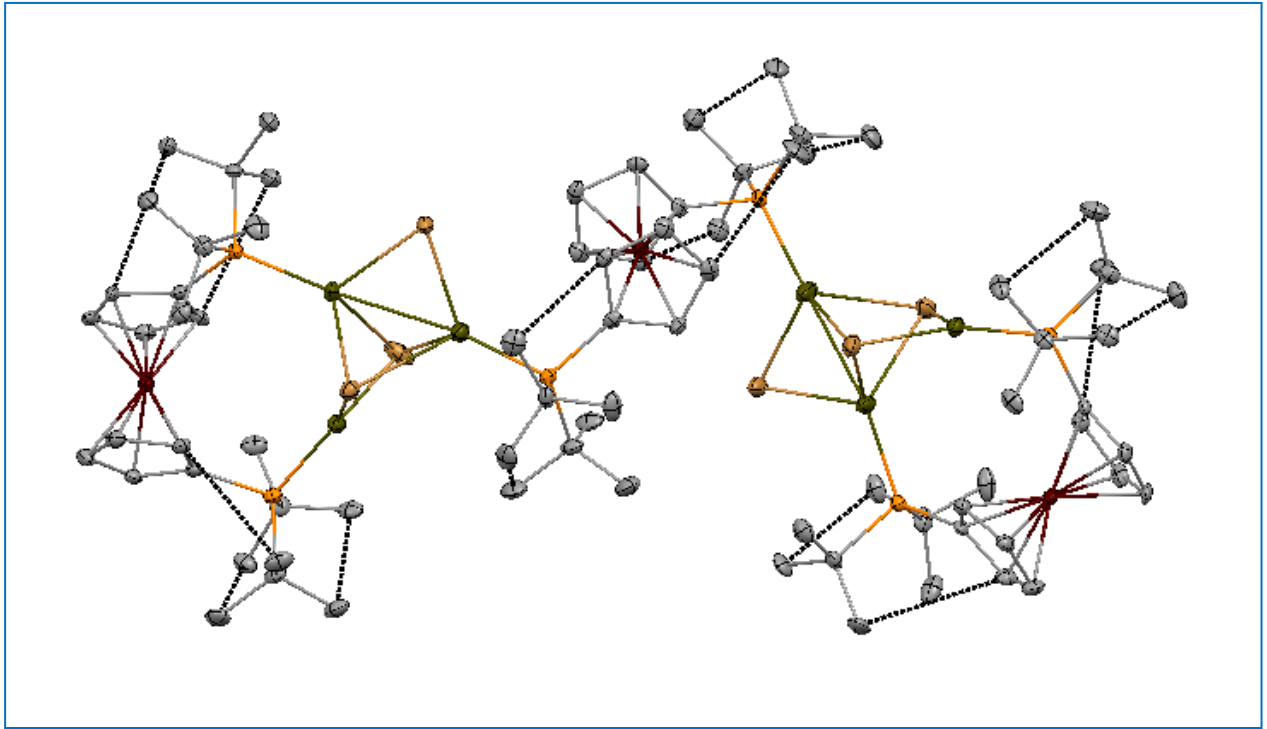

F-17.  $\pi \cdots \pi$  interactions in **3**.

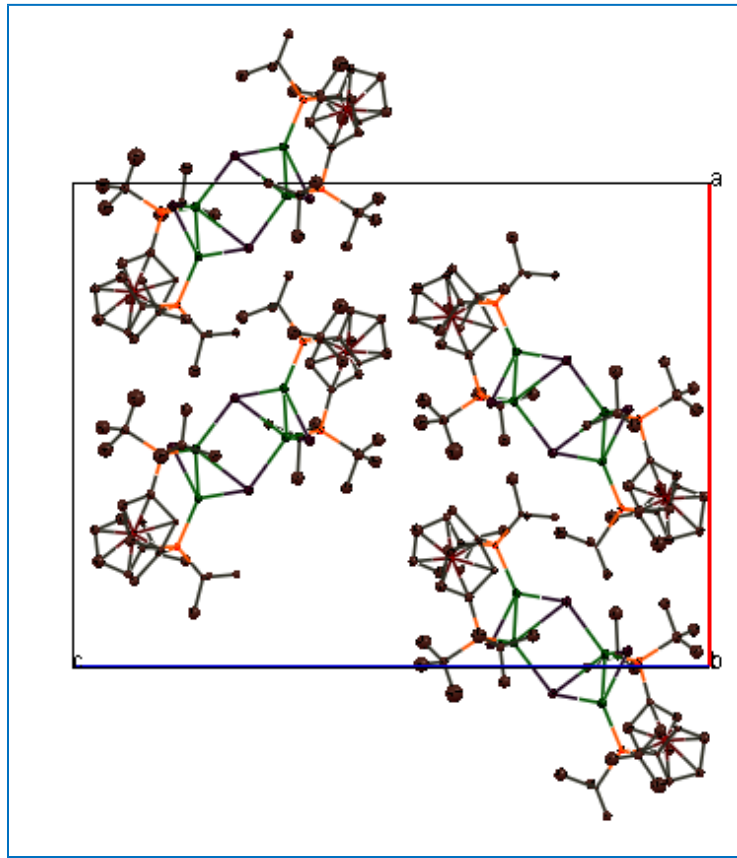

**F-18.** Crystal packing diagram of **2**, viewed along the *b* axis.

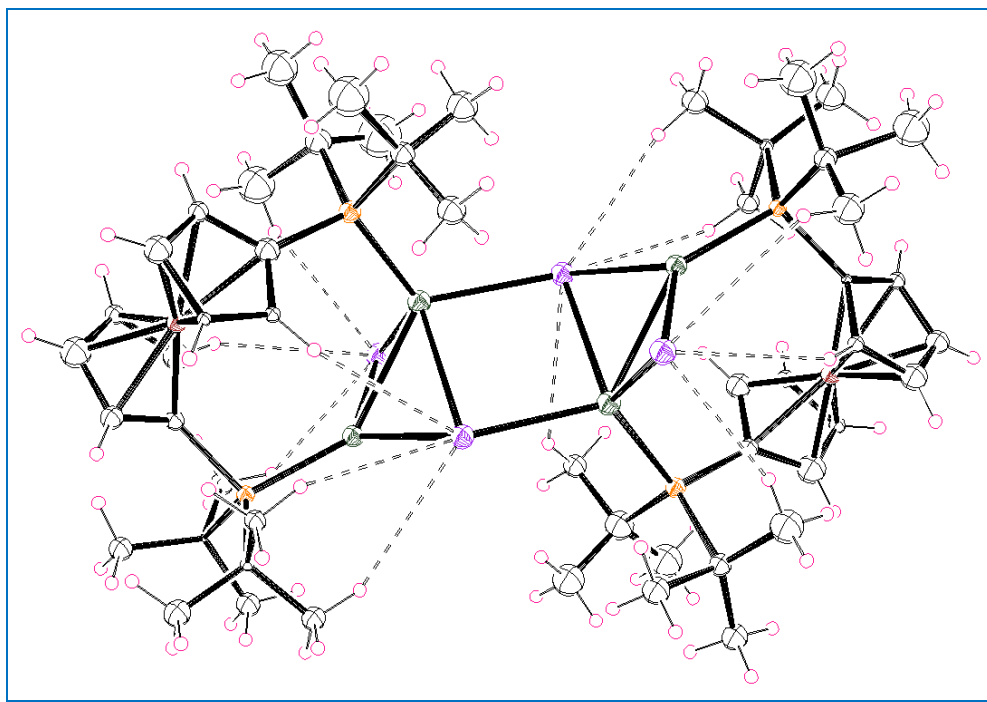



**F-19.** Ortep diagram of **2** showing C-H...I hydrogen bond interactions in the crystal lattice.

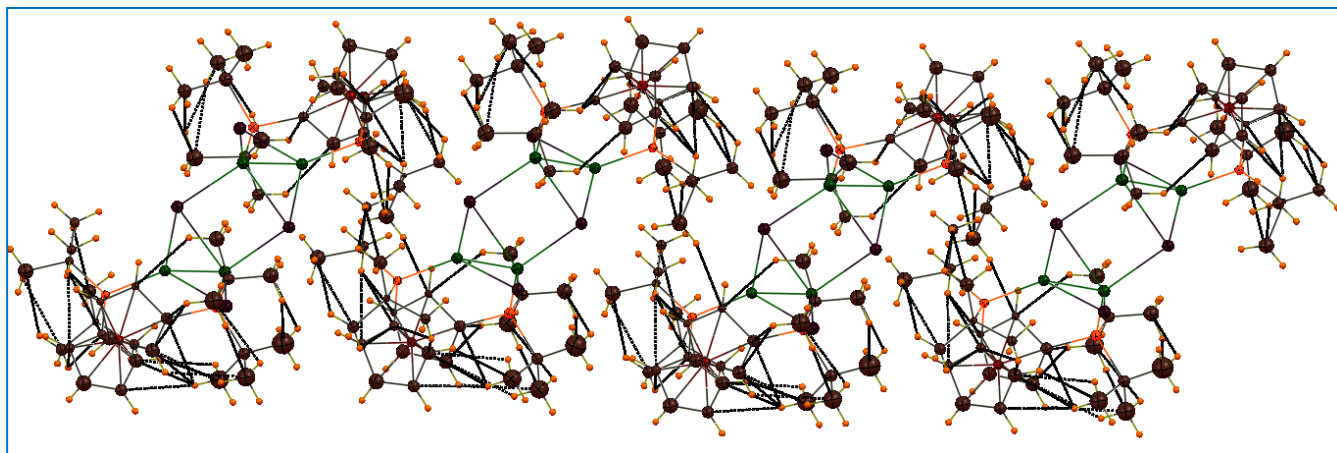

**F-20.** C-H... $\pi$  interactions in **2**.

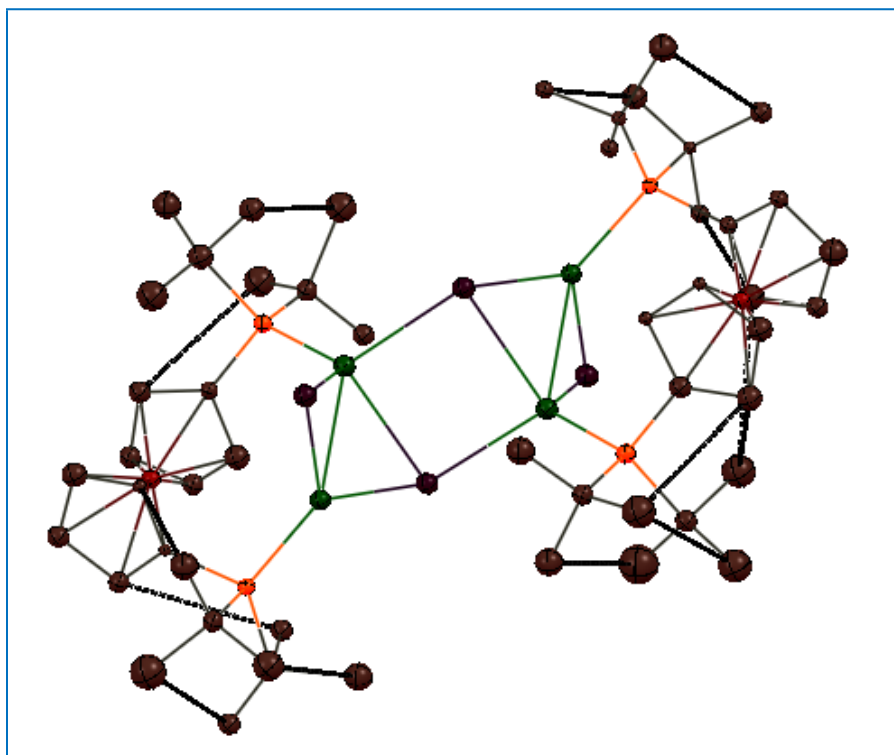

F-21.  $\pi \cdots \pi$  interactions in **2**.

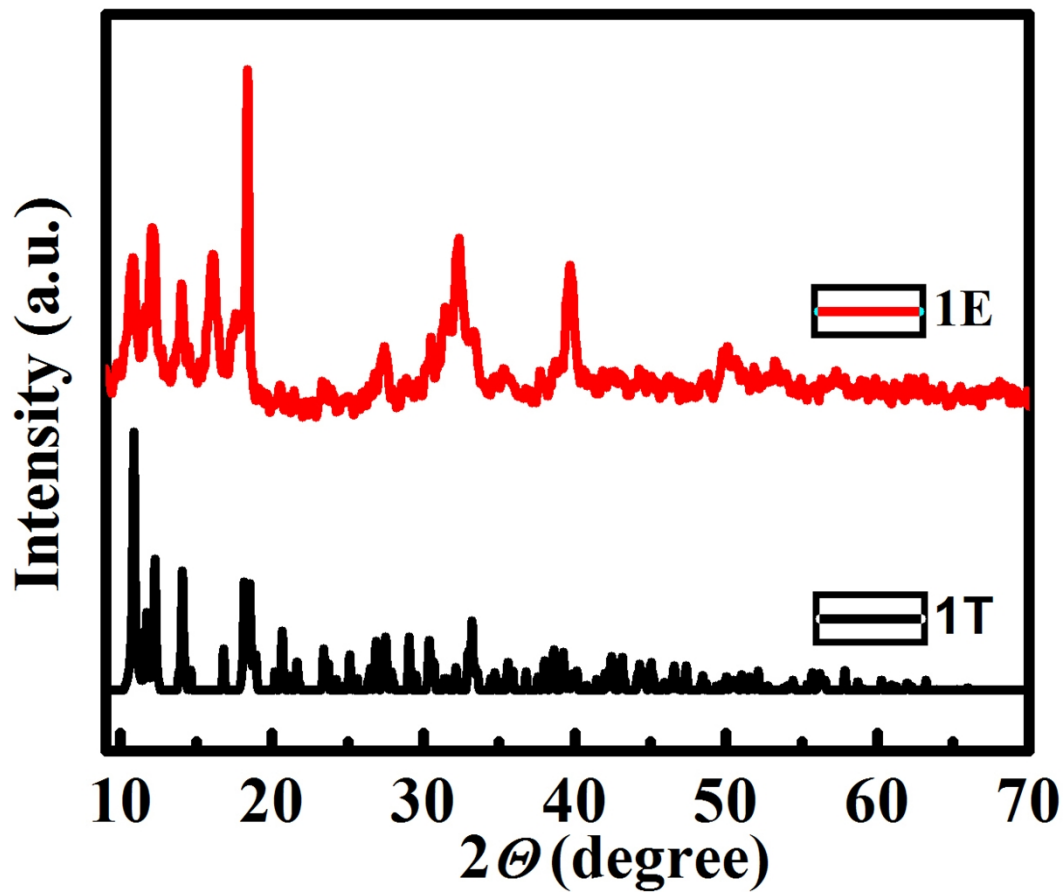

F-22. Powder XRD pattern of complex 1 (T = theoretical profile based on the structures determined by single-crystal XRD; E = experimental data).

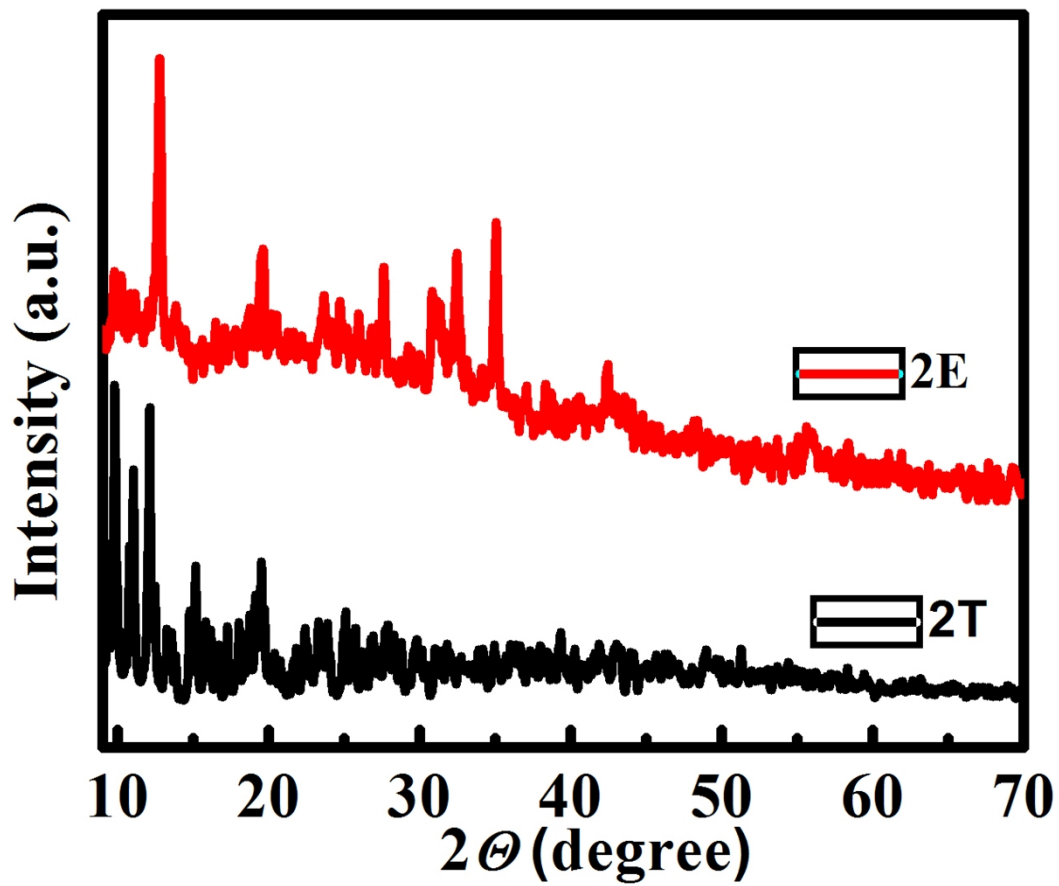

F-23. Powder XRD pattern of complex 2 (T = theoretical profile based on the structures determined by single-crystal XRD; E = experimental data).

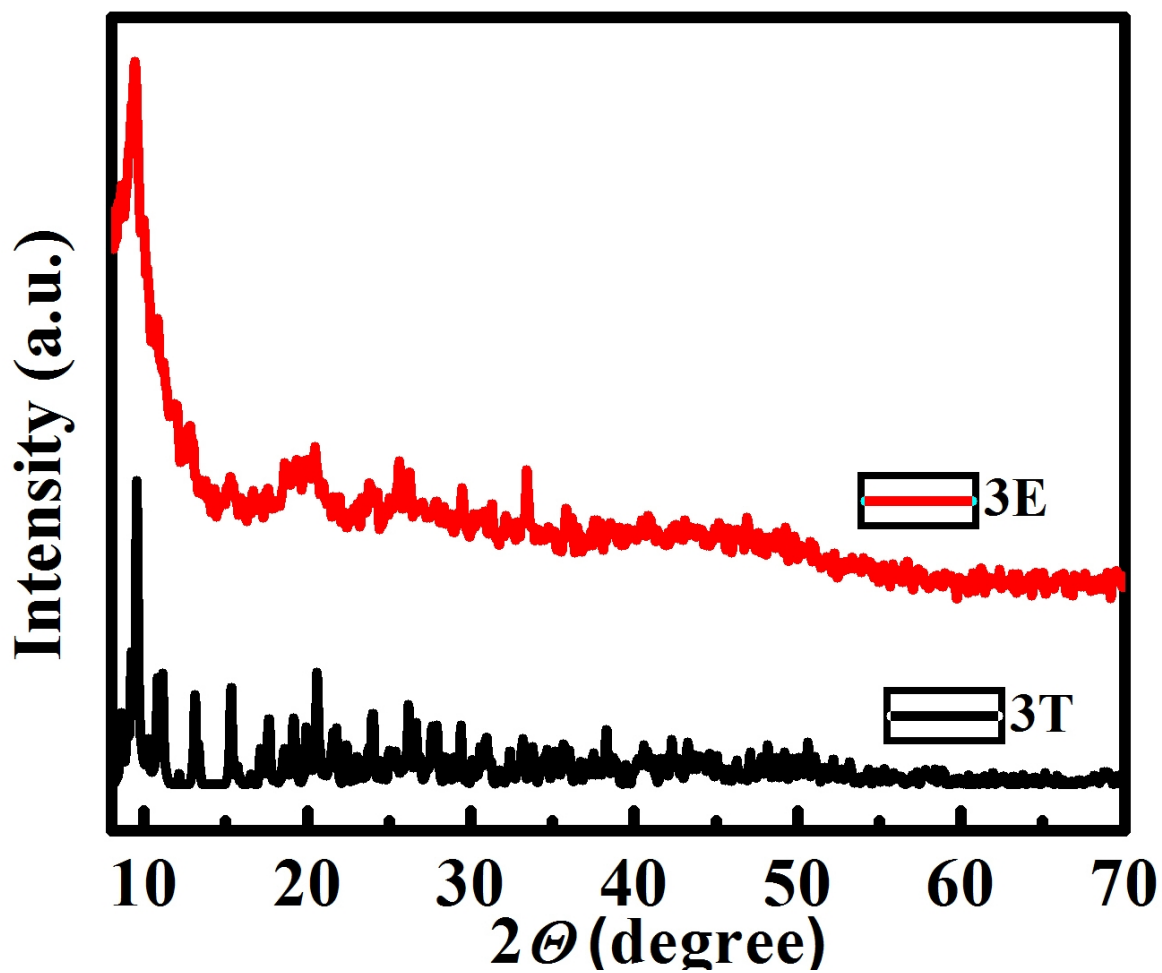

F-24. Powder XRD pattern of complex 3 (T = theoretical profile based on the structures determined by single-crystal XRD; E = experimental data).

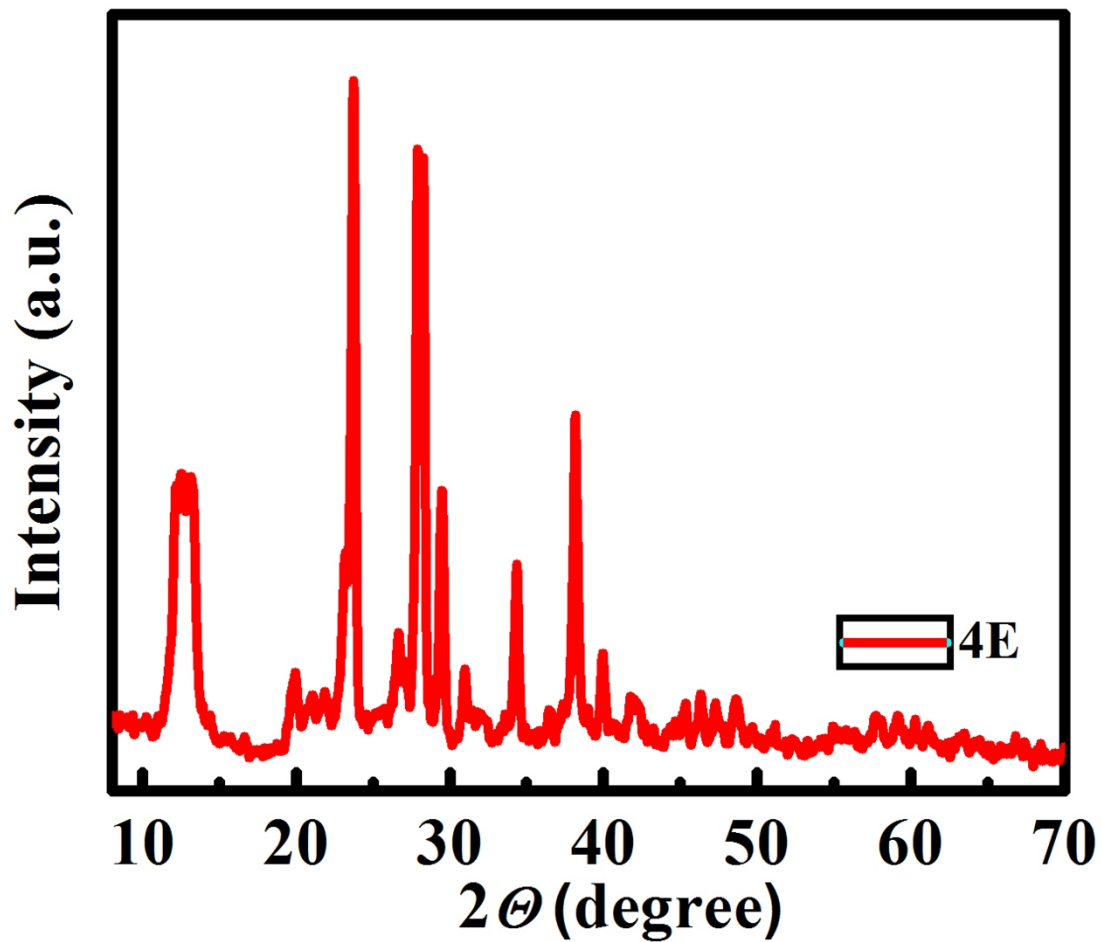

F-25. Powder XRD pattern of complex 4 (E = experimental data).

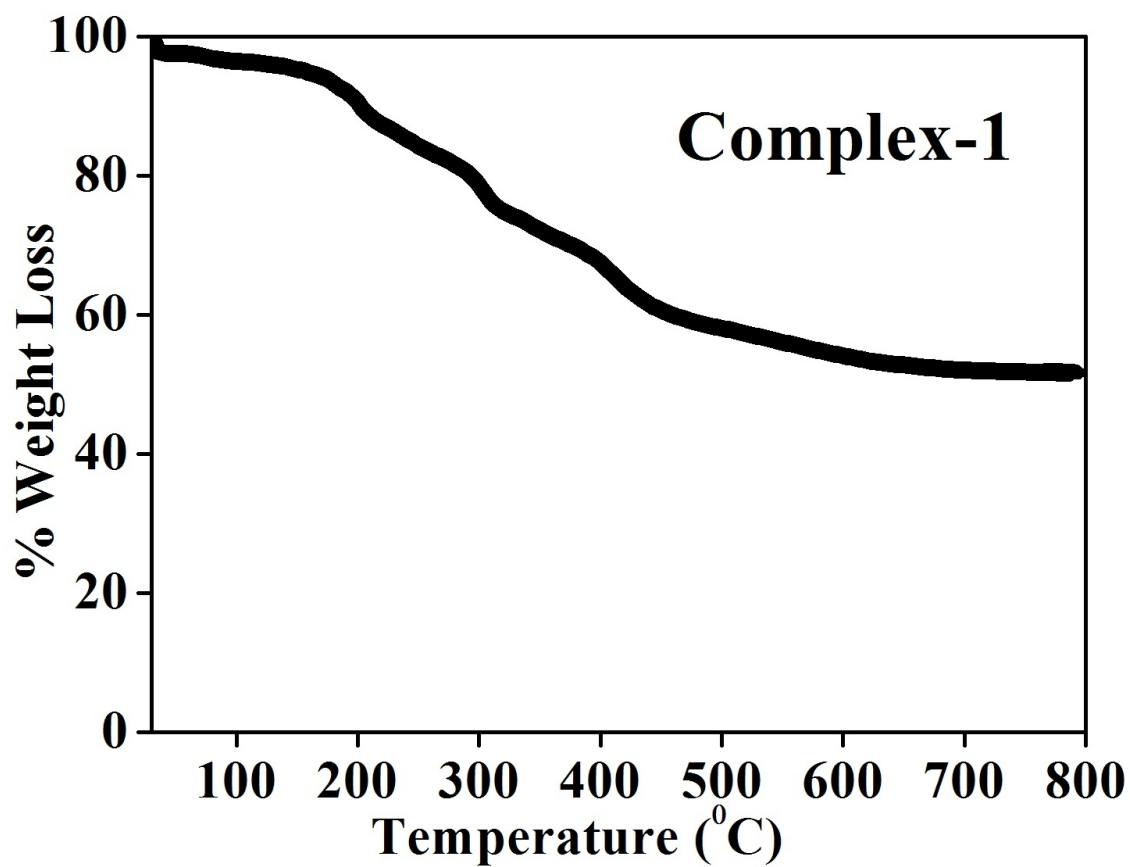

F-26. TGA curve for complex 1 in air.



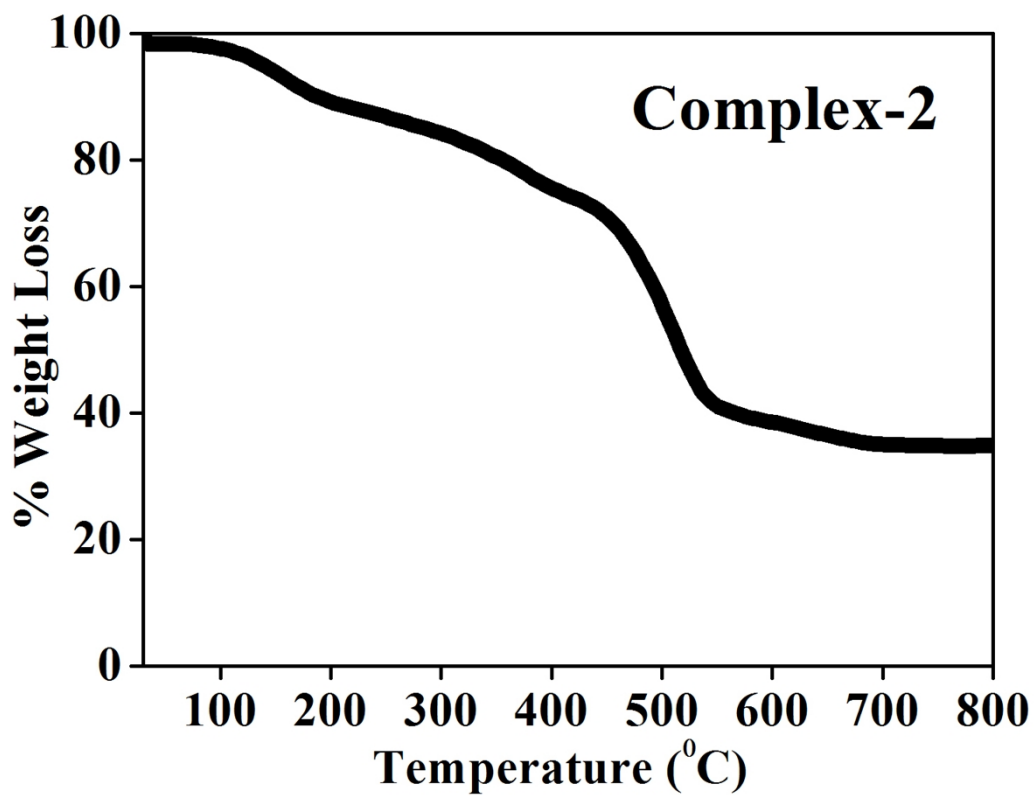

F-27. TGA curve for complex 2 in air.

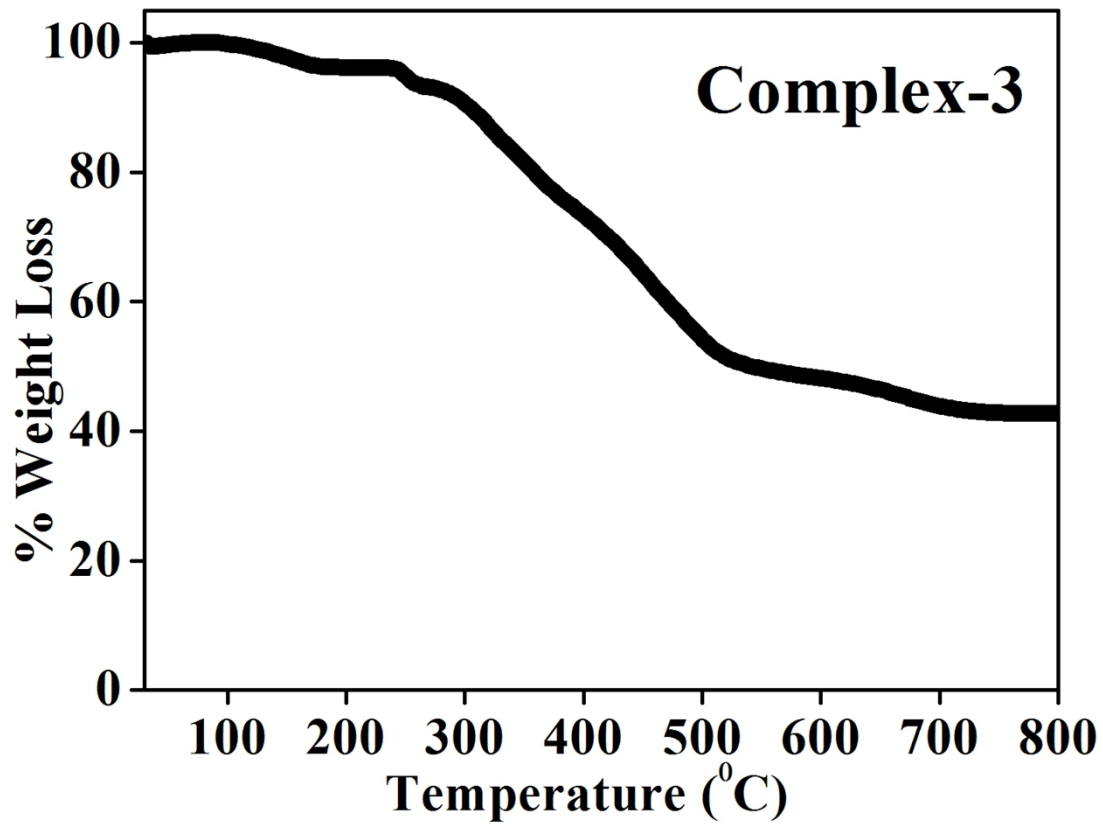

F-28. TGA curve for complex 3 in air.

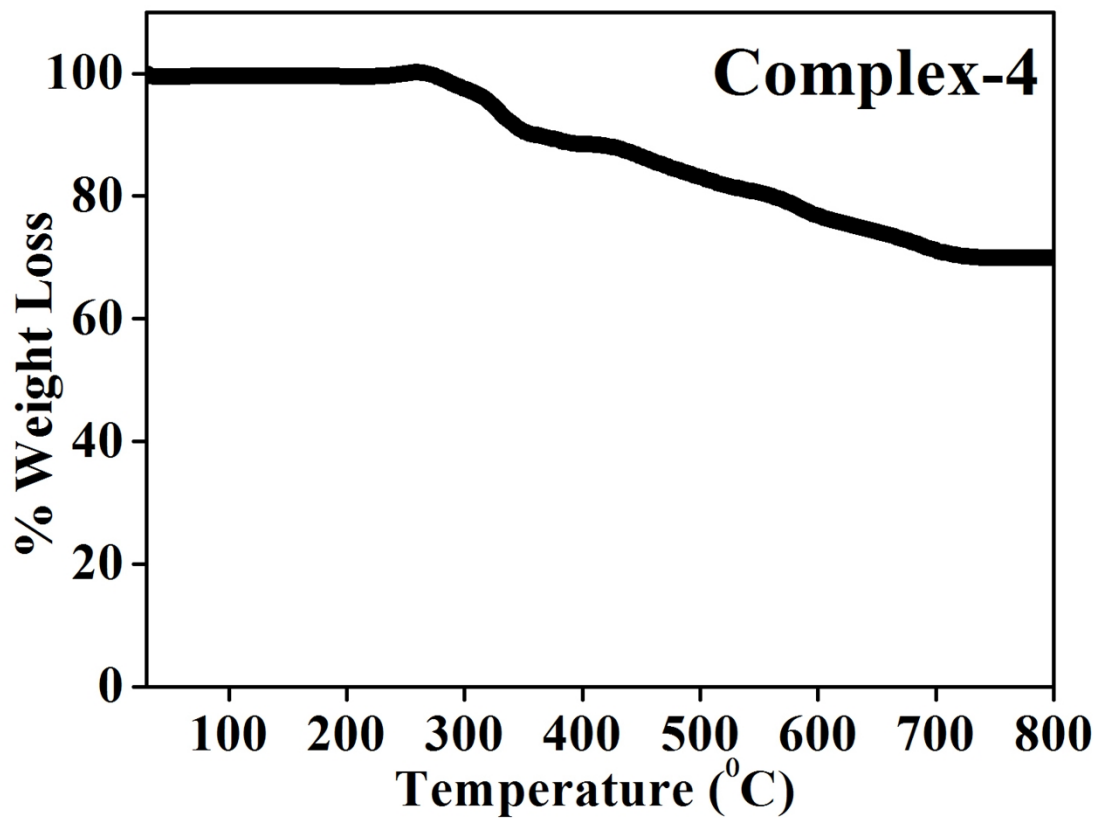

F-29. TGA curve for complex-4 in air.

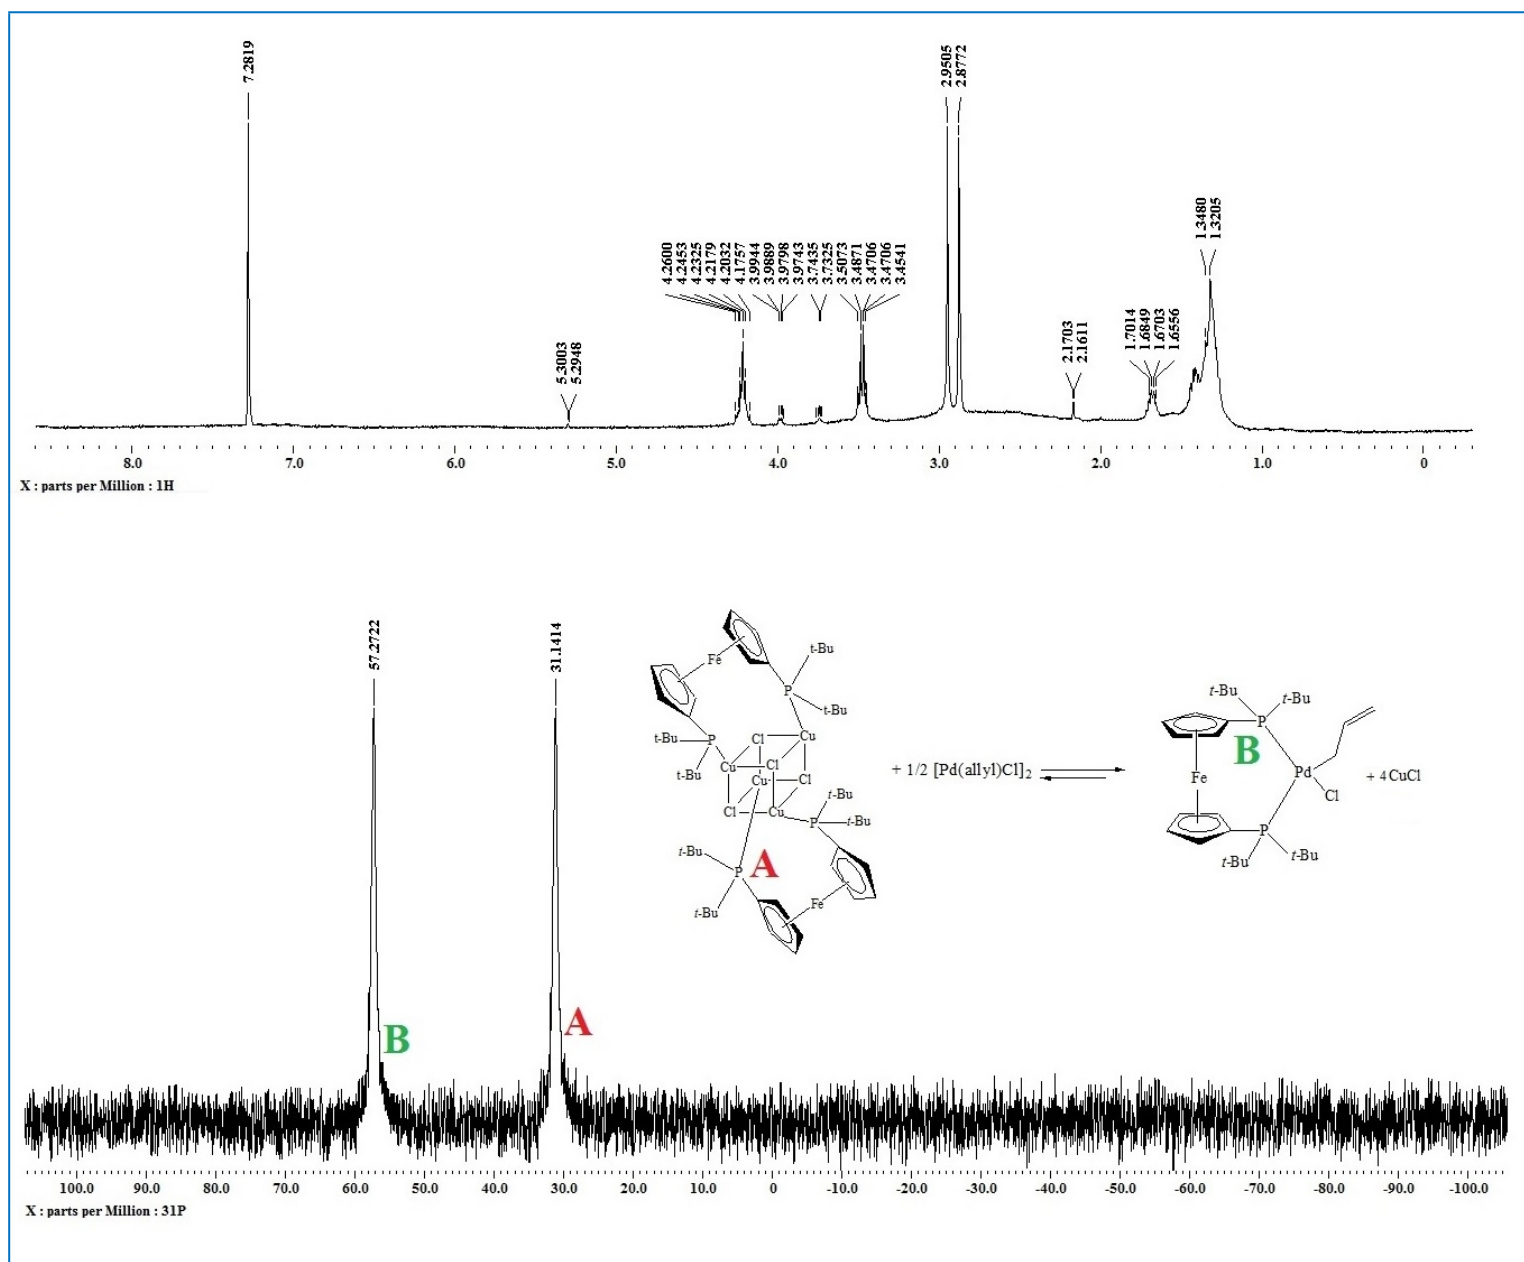

**F-30.**  $^1\text{H}$  and  $^{31}\text{P}$  NMR spectrum of a mixture of complex 1 with  $[\text{Pd}(\text{allyl})\text{Cl}]_2$  in  $\text{CDCl}_3$  after 2h at room temperature.

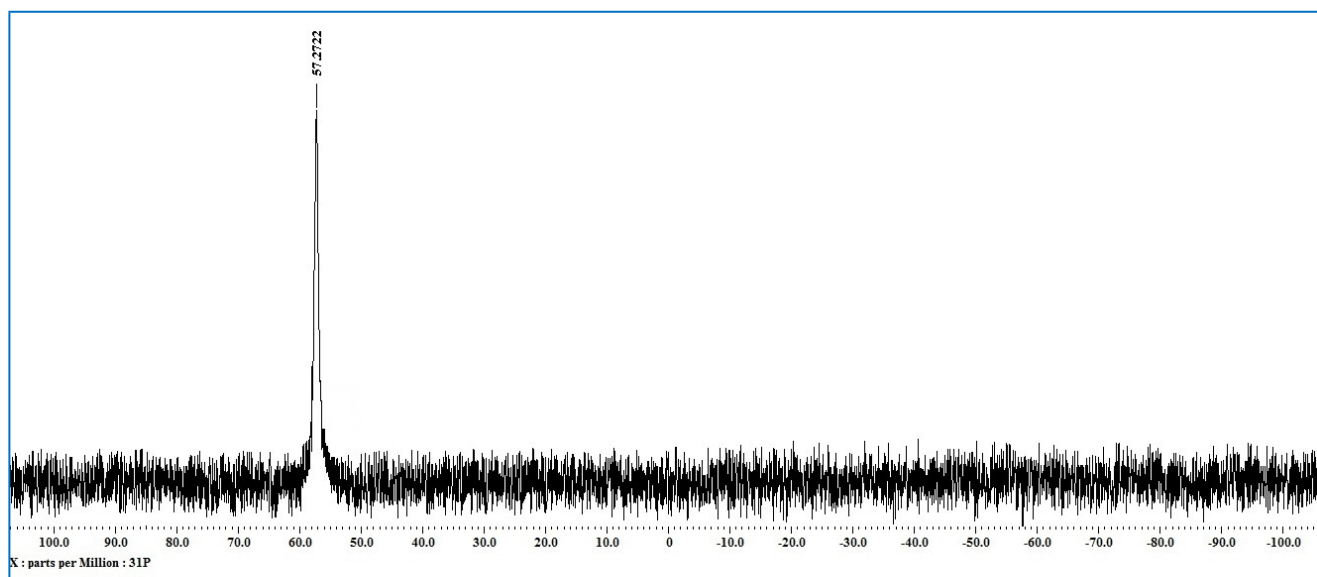

**F-31.**  $^{31}\text{P}$  NMR spectrum of a mixture of **1** with  $[\text{Pd}(\text{allyl})\text{Cl}]_2$  in  $\text{CDCl}_3$  after 20h at room temperature: total transfer of the ligand from copper to palladium.

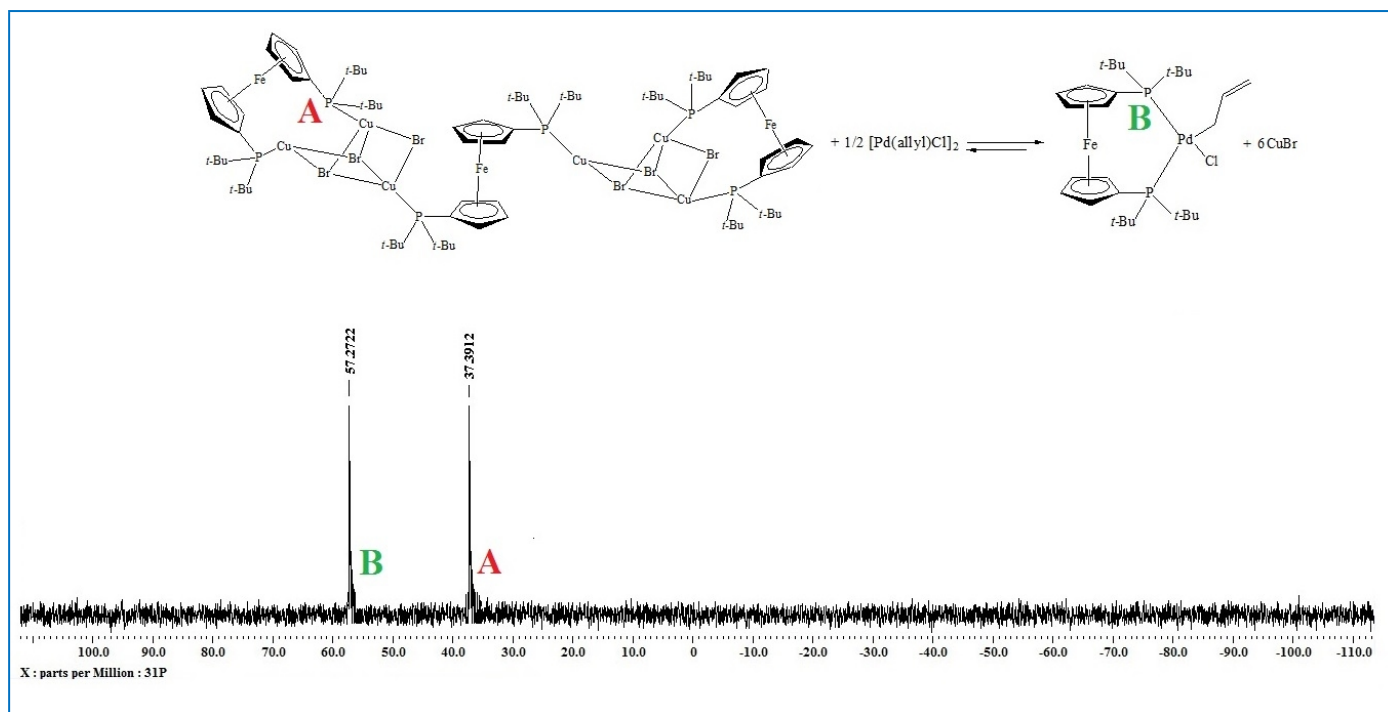

F-32.  $^{31}P$  NMR spectrum of a mixture of **2** with  $[Pd(allyl)Cl]_2$  in  $CDCl_3$  after 2h at room temperature.

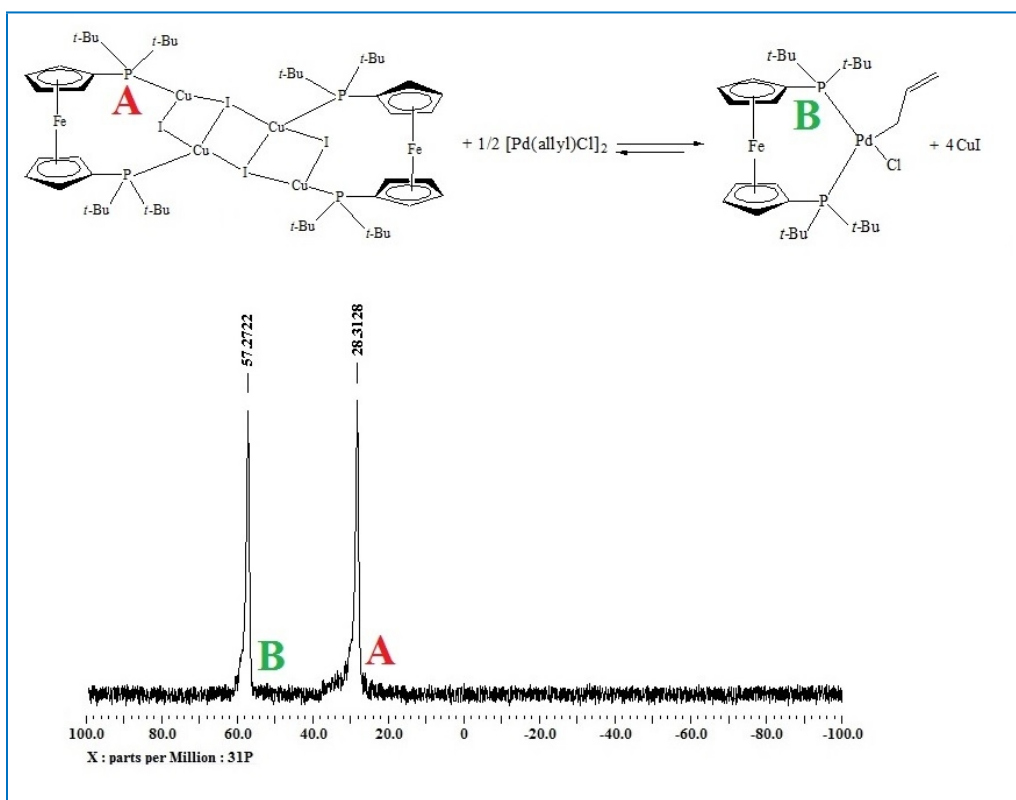

F-33.  $^{31}\text{P}$  NMR spectrum of a mixture of **3** with  $[\text{Pd}(\text{allyl})\text{Cl}]_2$  in  $\text{CDCl}_3$  after 2h at room temperature.

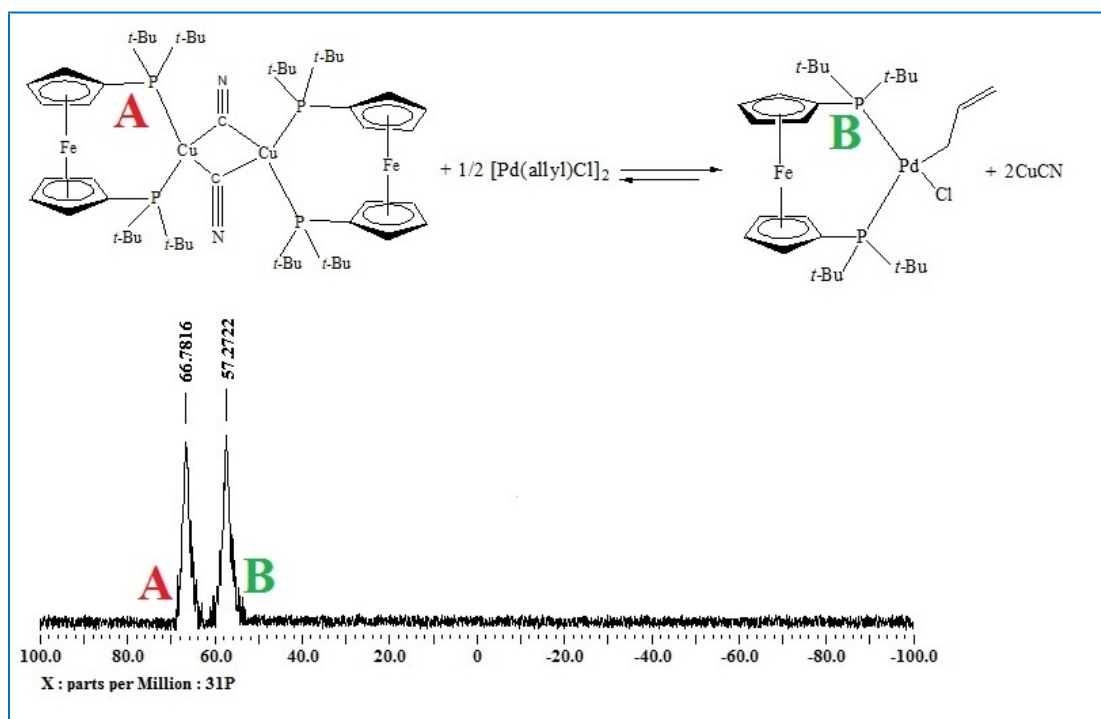

F-34.  $^{31}\text{P}$  NMR spectrum of a mixture of **4** with [Pd(allyl)Cl] $_2$  in  $\text{CDCl}_3$  after 2h at room temperature.



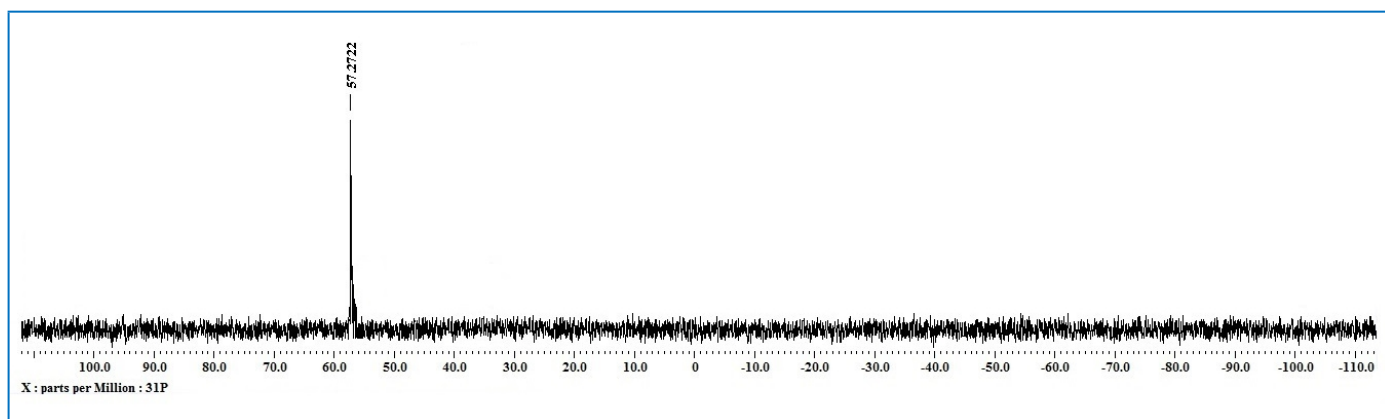

**F-35.**  $^{31}\text{P}$  NMR spectrum of a mixture of **2** with  $[\text{Pd}(\text{allyl})\text{Cl}]_2$  in  $\text{CDCl}_3$  after 20h at room temperature: total transfer of the ligand from copper to palladium.

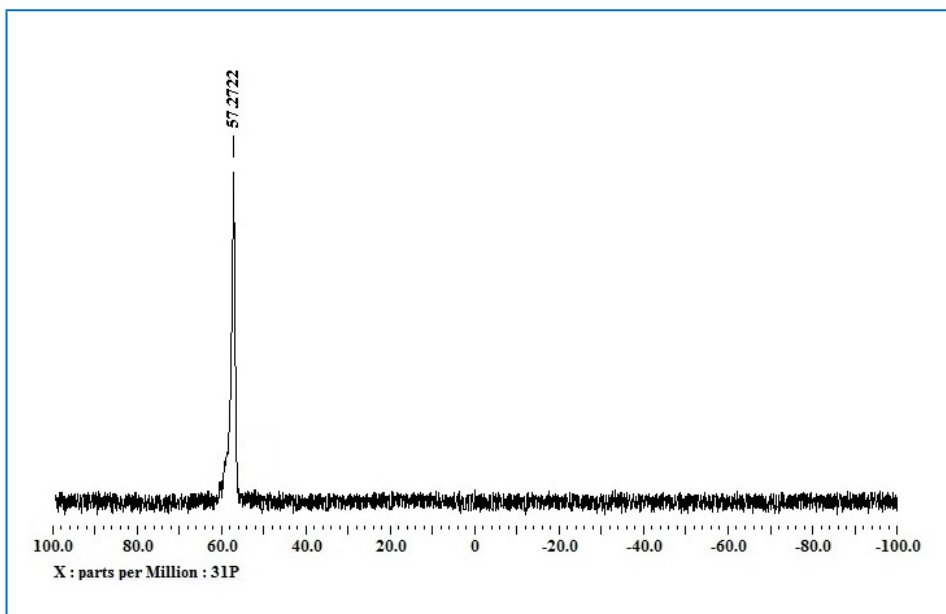

**F-36.**  $^{31}\text{P}$  NMR spectrum of a mixture of **3** with  $[\text{Pd}(\text{allyl})\text{Cl}]_2$  in  $\text{CDCl}_3$  after 20h at room temperature: total transfer of the ligand from copper to palladium.

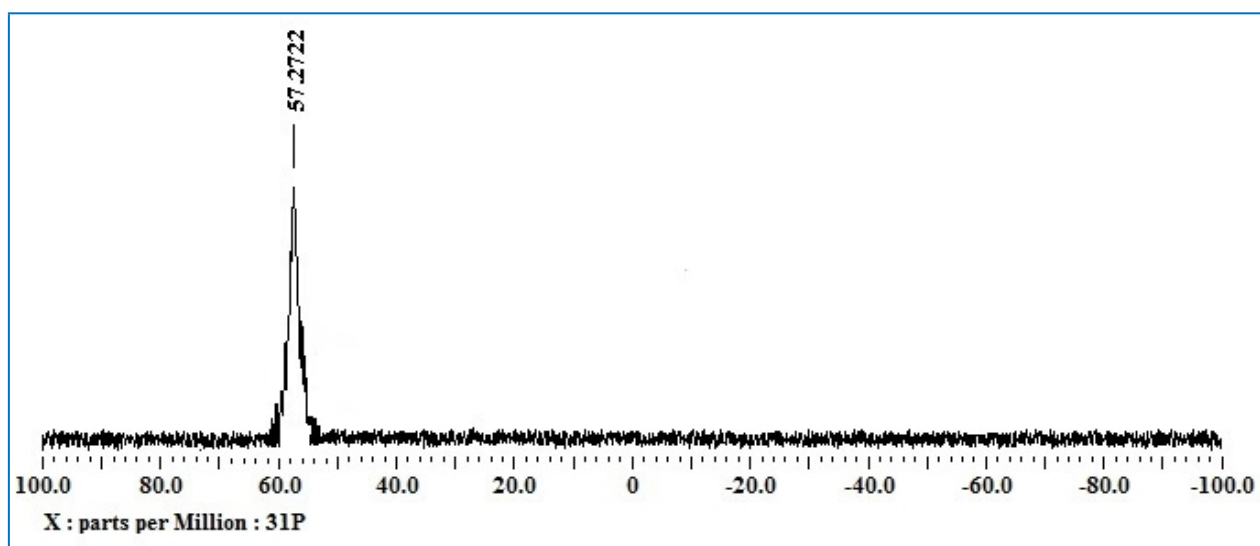

**F-37.**  $^{31}\text{P}$  NMR spectrum of a mixture of **4** with  $[\text{Pd}(\text{allyl})\text{Cl}]_2$  in  $\text{CDCl}_3$  after 20h at room temperature: total transfer of the ligand from copper to palladium.

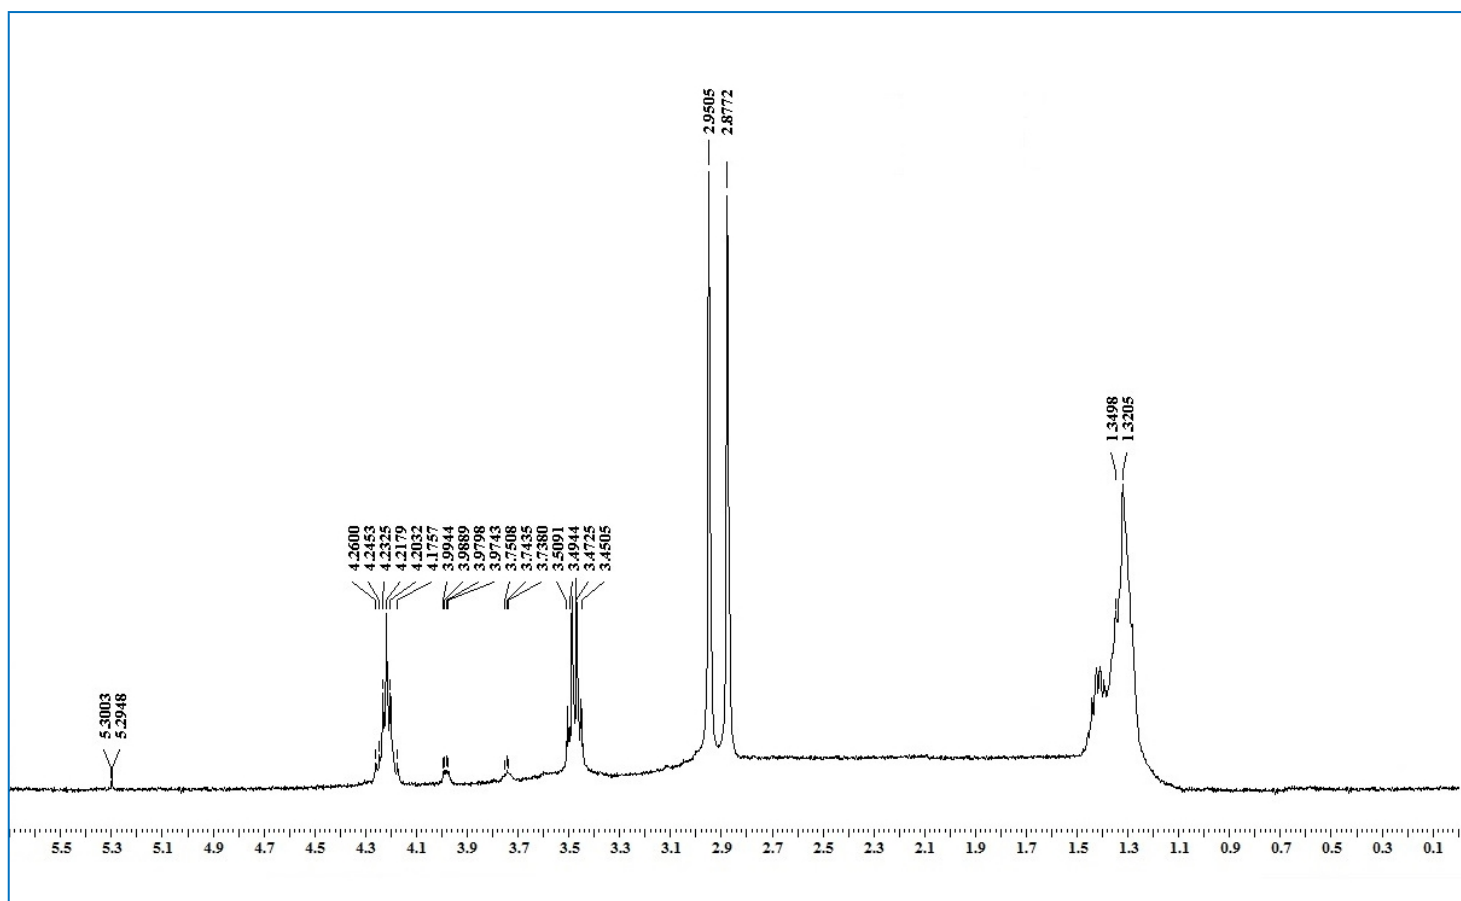

F-38. <sup>1</sup>H NMR spectrum of [PdCl( $\mu_1$ -C<sub>3</sub>H<sub>5</sub>)( $\kappa^2$ -P,P-dtbpf)].

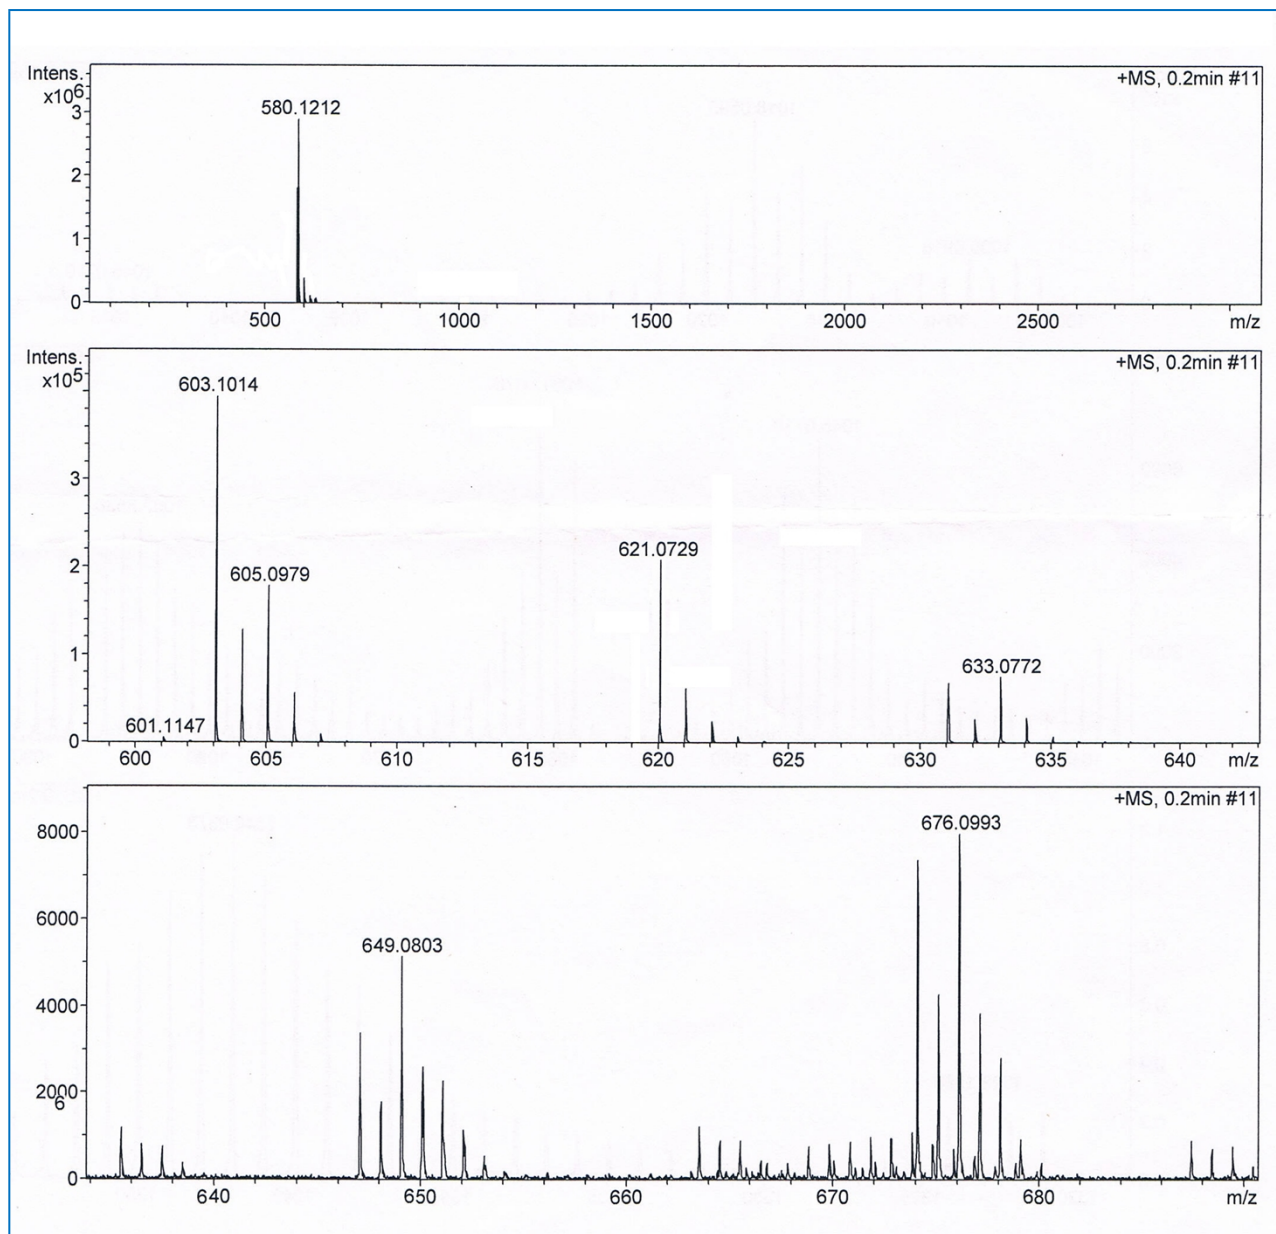

**F-39.** ESI-MS of  $[\text{PdCl}(\mu_1\text{-C}_3\text{H}_5)(\kappa^2\text{-P,P-dtbpf})]$ .

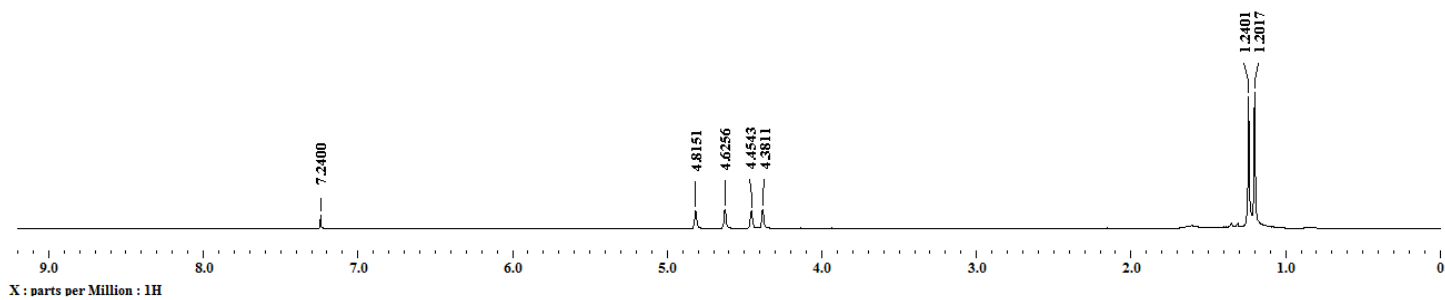

F-40. <sup>1</sup>H NMR spectrum of oxidized dtbpf (dtbpf+ H<sub>2</sub>O<sub>2</sub>) in CDCl<sub>3</sub>.

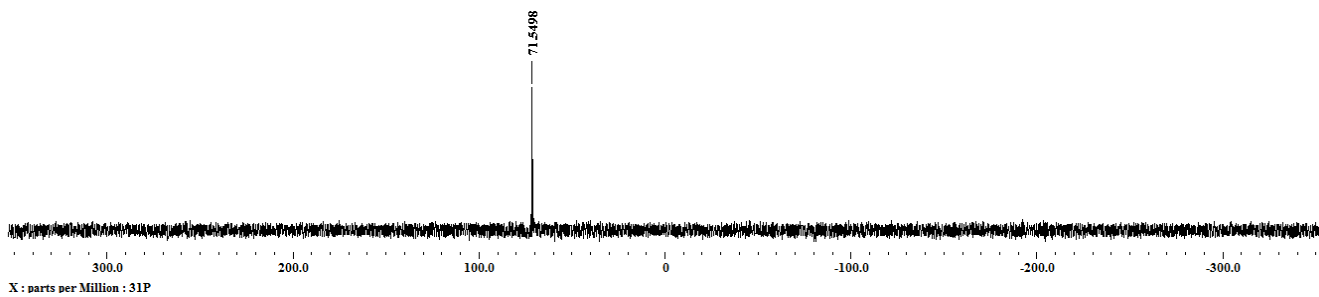

F-41. <sup>31</sup>P NMR spectrum of oxidized dtbpf (dtbpf+ H<sub>2</sub>O<sub>2</sub>) in CDCl<sub>3</sub>.

**Diphenyl acetylene:** White solid, (60-95% yield), mp.: 54-55°C,  $^1\text{H}$  NMR (400 MHz,  $\text{CDCl}_3$ )  $\delta = 7.62$  (d, 4H,  $J = 7.5$  Hz, ArH),  $\delta = 7.50$  (m, 6H, ArH) ppm;  $^{13}\text{C}$  (400 MHz,  $\text{CDCl}_3$ ):  $\delta = 132.62, 129.73, 128.93, 121.03, 81.58$  ppm. GCMS  $m/z$ (% rel. inten.) 178 ( $\text{M}^+$ , 100).<sup>1</sup>

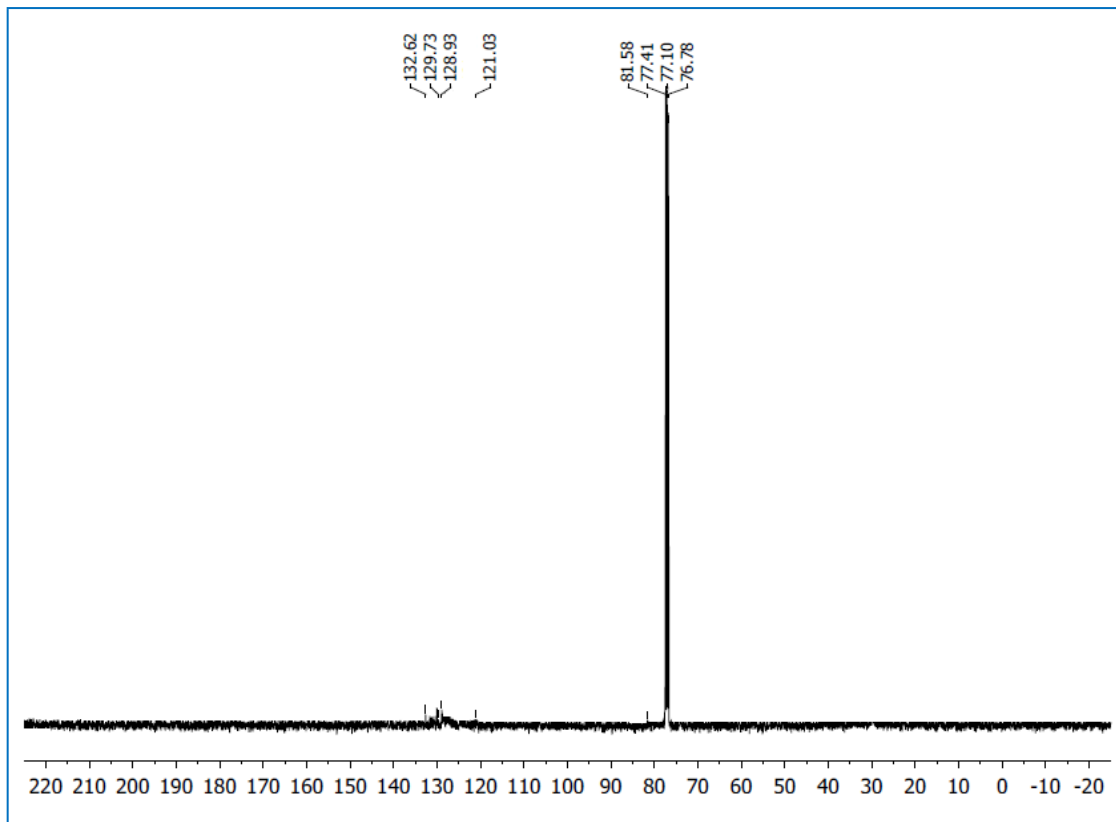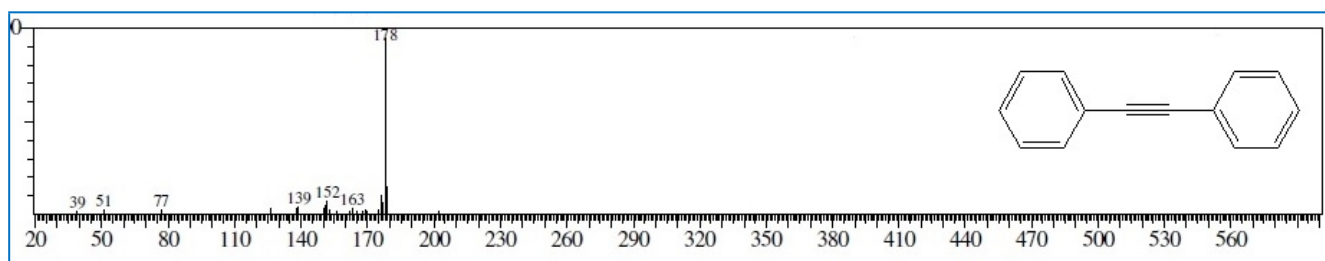

**4-methyl-diphenylacetylene:** White solid, (58-99% yield), mp.: 52°C  $^1\text{H}$  NMR (400 MHz,  $\text{CDCl}_3$ )  $\delta = 2.62$  (s, 3H,  $-\text{CH}_3$ ),  $\delta = 7.40$  (m, 4H, ArH),  $\delta = 7.85$  (d, 2H,  $J = 6.4$  Hz, ArH),  $\delta = 7.64$  (d, 2H,  $J = 7.5$  Hz, ArH),  $\delta = 7.51$  (m, 1H, ArH) ppm;  $^{13}\text{C}$  (400 MHz,  $\text{CDCl}_3$ ):  $\delta = 139.03, 132.59, 131.62, 129.19, 128.53, 128.15, 126.09, 119.15, 94.39$  ppm. GCMS  $m/z$ (% rel. inten.) 192( $\text{M}^+$ , 100).<sup>1</sup>

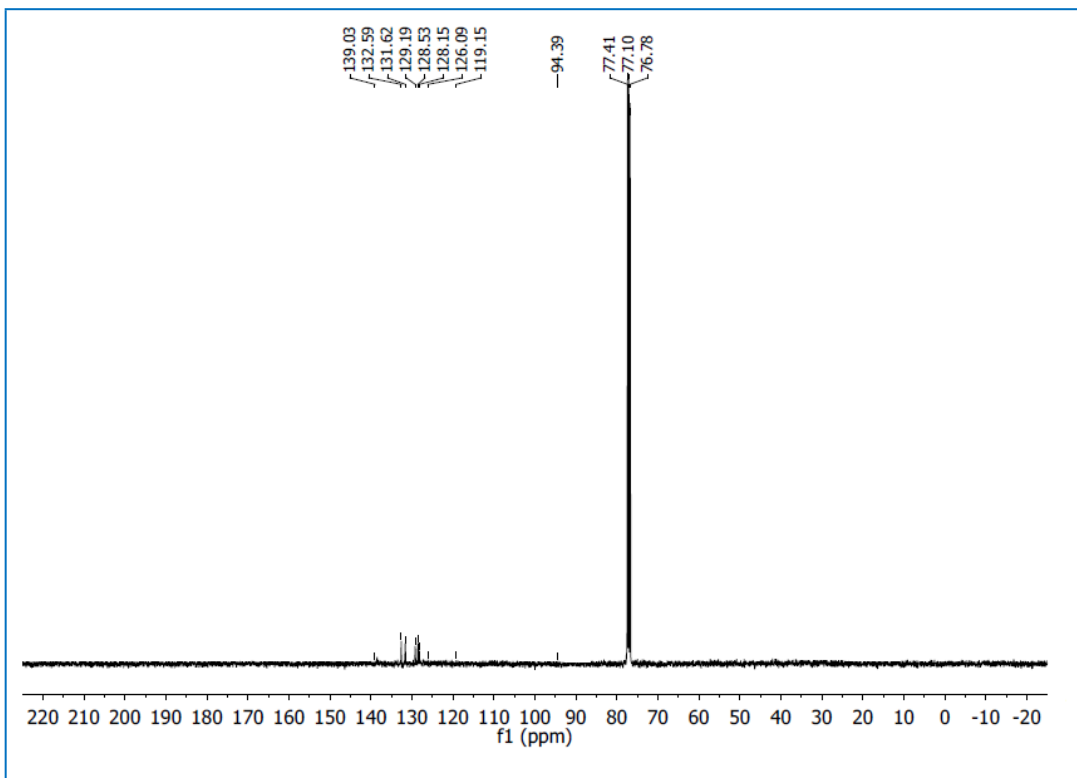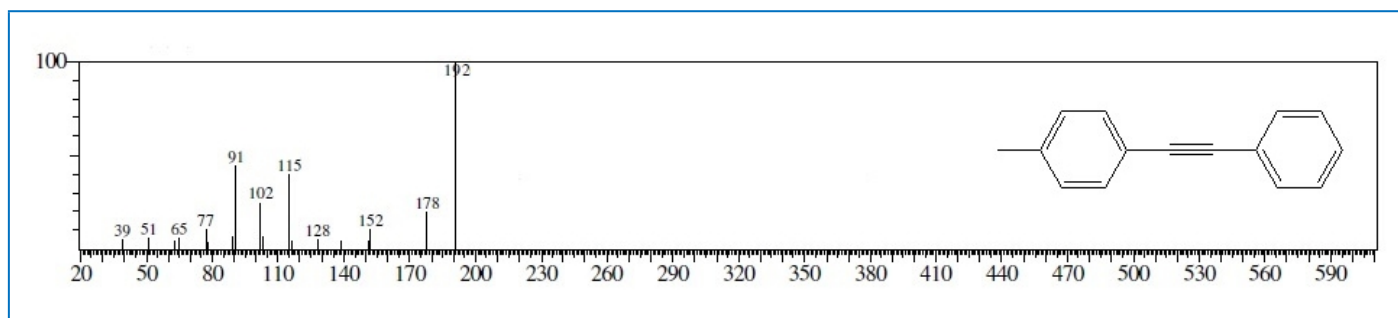

**References for Supporting Information:**

- (1) Modak, A.; Mondal, J.; Bhaumik, A. *Green Chem.* **2012**, *14*, 2840-2855.
